# Supplementary material
Source: PubMed Central journal article supplement (PMC7328826)
Supplement: NIHMS1602739-supplement-experimental_details.pdf [file NIHMS1602739-supplement-experimental_details.pdf]

# Supporting Information

## Site selective amide reduction of cyclosporine A opens new structural space for an important cyclic peptide

Michael T. Peruzzi, Fabrice Gallou, Stephen J. Lee, Michel R. Gagné

## **Table of contents**

|                                                      |    |
|------------------------------------------------------|----|
| General Methods .....                                | 2  |
| MS <sup>2</sup> Analysis .....                       | 3  |
| Representative procedure for silane reductions ..... | 7  |
| Representative alkylation procedure.....             | 10 |
| Reductive cyanation procedure.....                   | 15 |
| NMR spectra .....                                    | 17 |
| MS <sup>2</sup> peak lists.....                      | 36 |

## General Methods

Unless otherwise stated, all commercially available reagents were used as received. Chloroform was distilled over P<sub>2</sub>O<sub>5</sub> and stored over 3Å sieves before use. Trifluorotoluene was distilled from CaH<sub>2</sub> and stored over 4Å molecular sieves before use. Acetonitrile was distilled over CaH<sub>2</sub> before use. Deuterated solvents (Cambridge isotope laboratories) were stored over 3Å sieves before use. All solvents were subjected to 3 freeze-pump-thaw cycles before use. All reactions were performed under an atmosphere of nitrogen unless otherwise stated. Thin layer chromatography (TLC) was performed on SiliCycle Silica Gel 60 F254 plates and was visualized with UV light and KMnO<sub>4</sub> stain. NMR spectra were recorded on a Bruker Avance 700 or 600 MHz spectrometer. The residual solvent protons (<sup>1</sup>H) or the solvent carbons (<sup>13</sup>C) were used as internal standards. <sup>1</sup>H NMR data are presented as follows: chemical shift in ppm (δ) downfield from tetramethylsilane (multiplicity, coupling constant, integration). The following abbreviations are used in reporting NMR data: s, singlet; d, doublet; t, triplet; q, quartet; dd, doublet of doublets; dt, doublet of triplets; ddd, doublet of doublet of doublets; m, multiplet. Infrared (IR) spectra were obtained using a Jasco 460 Plus Fourier transform infrared spectrometer. Samples were analyzed with a Q Exactive HF-X (ThermoFisher, Bremen, Germany) mass spectrometer. Samples were introduced via a heated electrospray source (HESI) at a flow rate of 10 μL/min. 100 time domain transients were averaged in the mass spectrum. ESI source conditions were set as: vaporizer temperature 35 °C, sheath gas (nitrogen) 8 arb, auxiliary gas (nitrogen) 0 arb, sweep gas (nitrogen) 0 arb, capillary temperature 320 °C, capillary voltage 320 V and funnel Rf level 35 V. The mass range was set to 150-2000 m/z. All measurements were recorded at a resolution setting of 120,000. Solutions were analyzed at 0.1 mg/mL or less based on responsiveness to the ESI mechanism. Xcalibur (ThermoFisher, Bremen, Germany) was used to analyze the data. Molecular formula assignments were determined with Molecular Formula Calculator (v 1.2.3). All observed species were singly charged, as verified by unit m/z separation between mass spectral peaks corresponding to the <sup>12</sup>C and <sup>13</sup>C <sup>12</sup>C<sub>-1</sub> isotope for each elemental composition. The LC method is described in the following table. The column model used was a Waters Acquity UPLC BEH C18 (1.7 μm, 2.1 mm, 50 mm) Absorbances were measured at 210 nm.

| Time (min) | Flow (mL/min) | %A | %B |
|------------|---------------|----|----|
| 0          | 0.6           | 80 | 20 |
| 3.00       | 0.6           | 40 | 60 |
| 8.75       | 0.6           | 5  | 95 |
| 10.20      | 0.6           | 5  | 95 |
| 10.21      | 0.6           | 80 | 20 |
| 11.25      | 0.6           | 80 | 20 |

A = H<sub>2</sub>O with 1% formic acid  
B = ACN with 1% formic acid

## MS<sup>2</sup> Analysis

ESI-MS<sup>2</sup> spectra (positive ion mode) were recorded on Q Exactive HF-X (ThermoFisher, Bremen, Germany) mass spectrometer. Samples (0.1 mg/mL) were introduced via a heated electrospray source (HESI) at a flow rate of 10  $\mu$ L/min. 100 time domain transients were averaged in the mass spectrum. ESI source conditions were set as: vaporizer temperature 35  $^{\circ}$ C, sheath gas (nitrogen) 8 arb, auxiliary gas (nitrogen) 0 arb, sweep gas (nitrogen) 0 arb, capillary temperature 320  $^{\circ}$ C, capillary voltage 320 V and funnel Rf level 35 V. The mass range was set to 150-2000 m/z. All measurements were recorded at a resolution setting of 120,000. NCE of 25-35. Baselines were adjusted by measuring the six times the standard deviation of baseline signals at five points throughout the mass spectrum. Depending on the sample, most ESI-MS<sup>2</sup> experiments generates >200 fragments which were analyzed as described below.

Prior to MS<sup>2</sup> analysis samples were desilylated by dissolving  $\sim$ 1 mg in MeOH (500  $\mu$ L) and trifluoroacetic acid (50  $\mu$ L). After stirring for one hour the sample was concentrated to dryness and redissolved MeOH (Optima, 1 mL)

### MS<sup>2</sup> fragmentation example

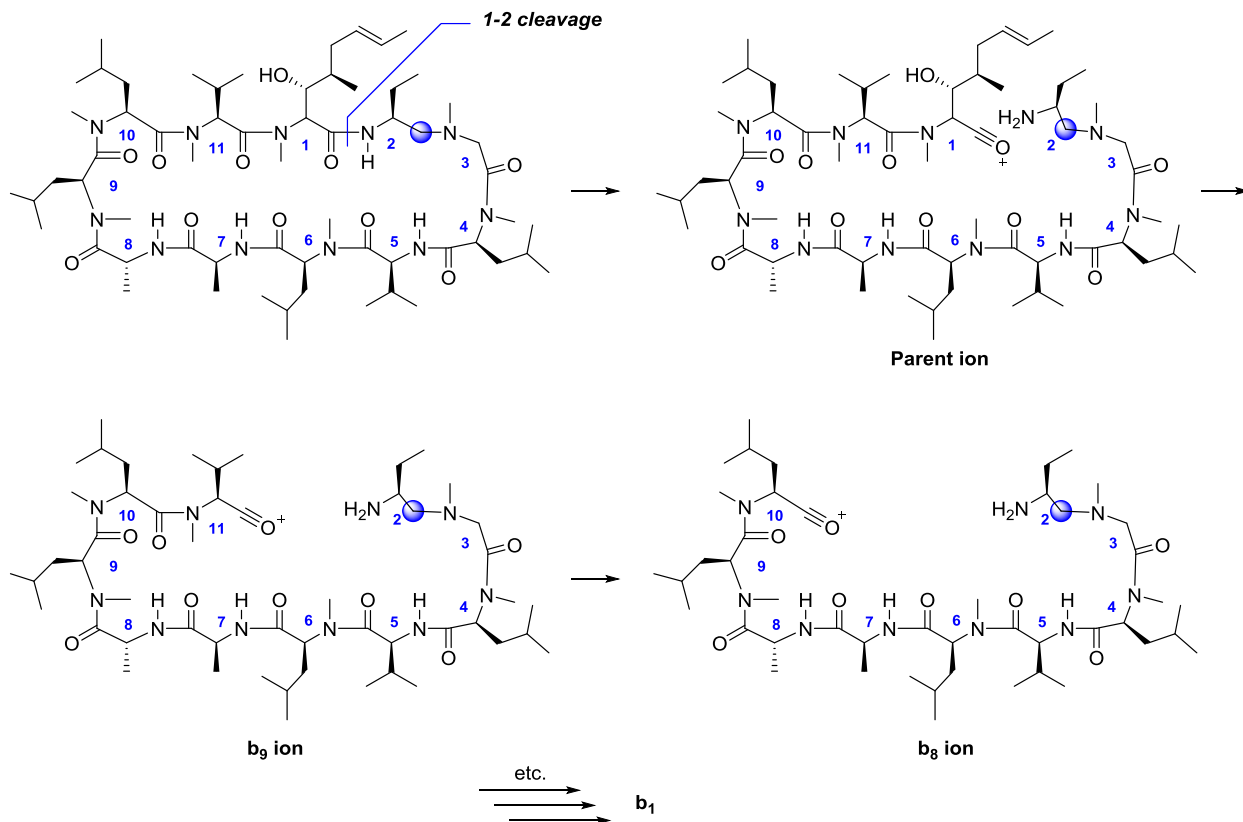

## Predicted fragments for reduction at Abu2

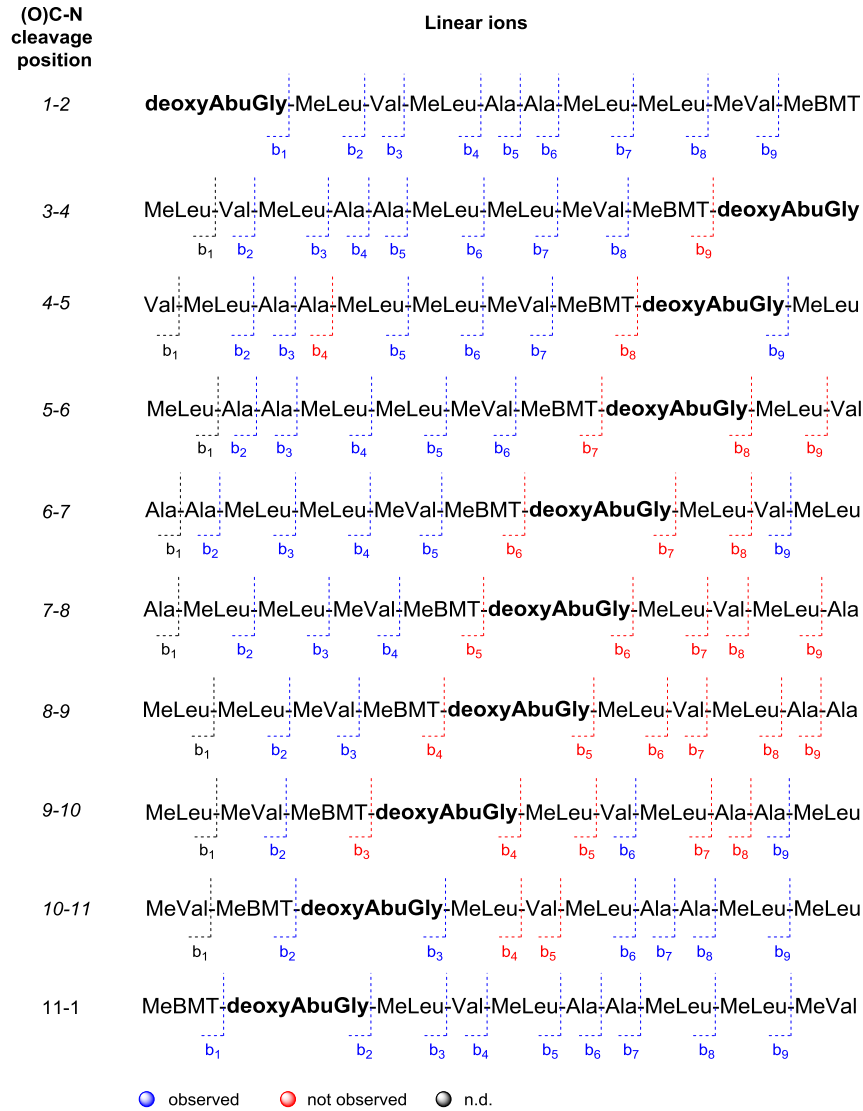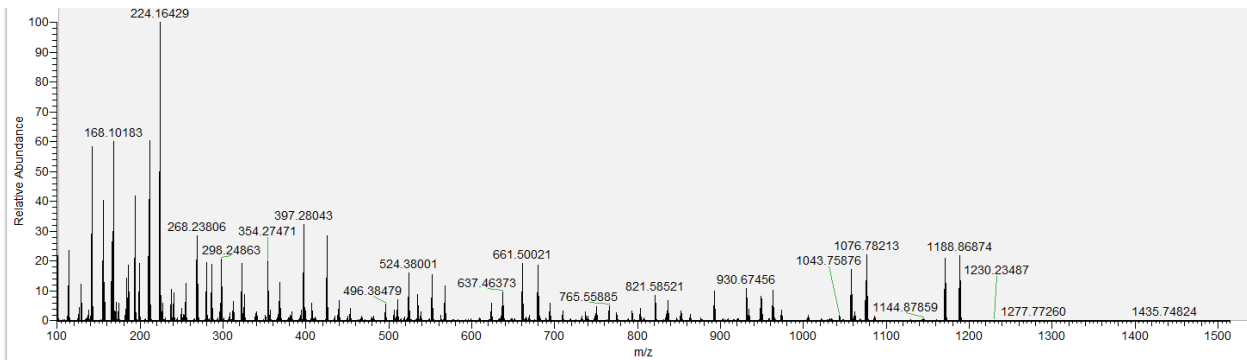

## Predicted fragments for reduction at Ala7

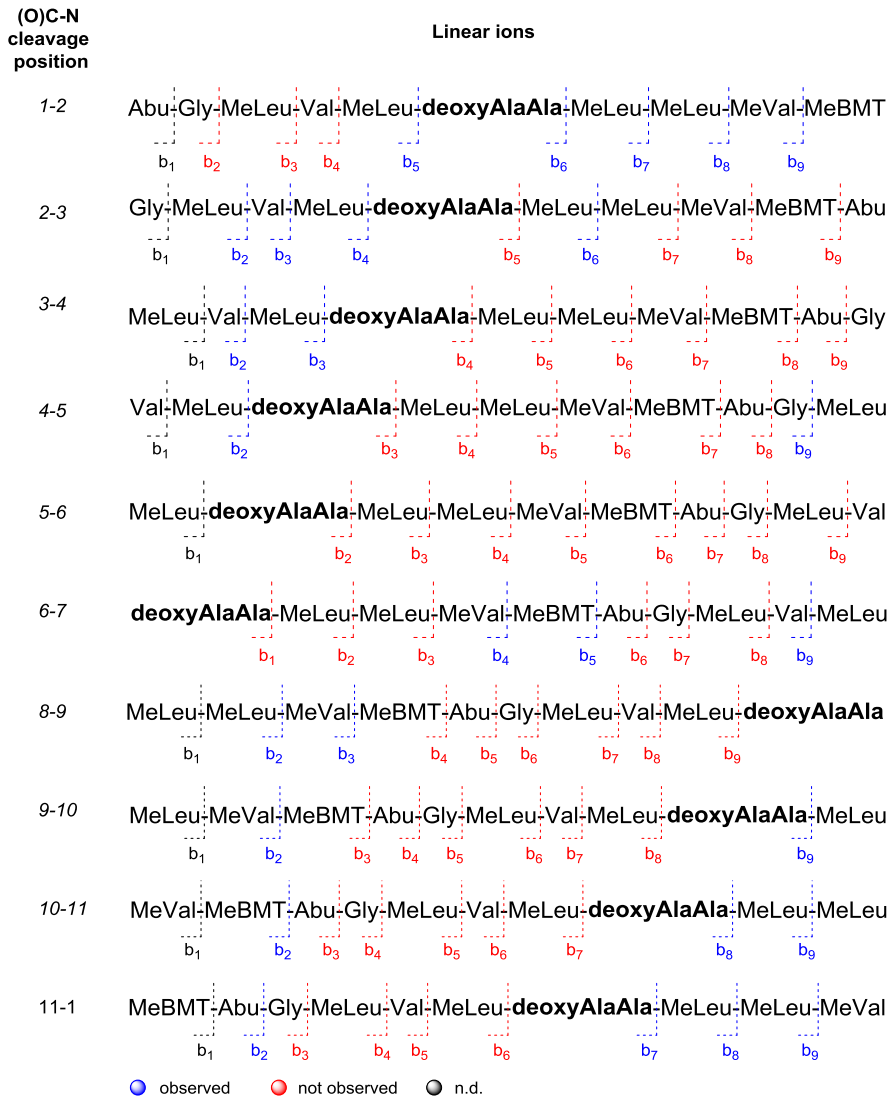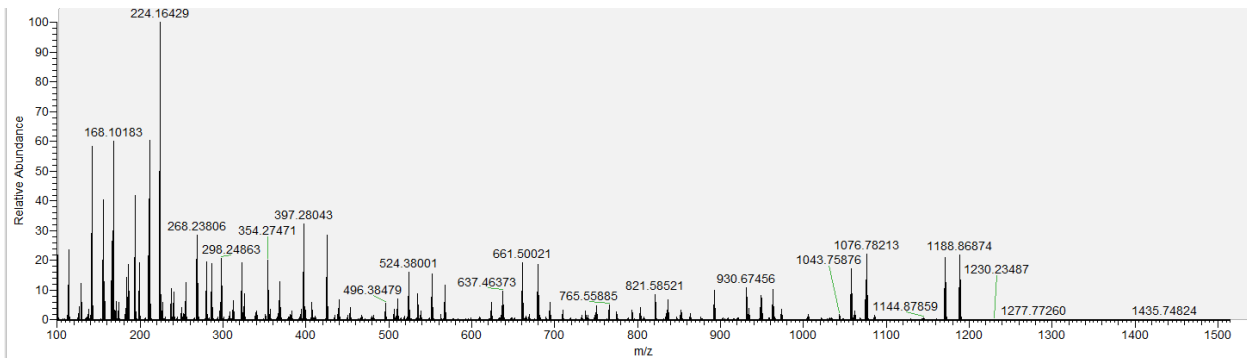

## Predicted fragments for reduction at 3d

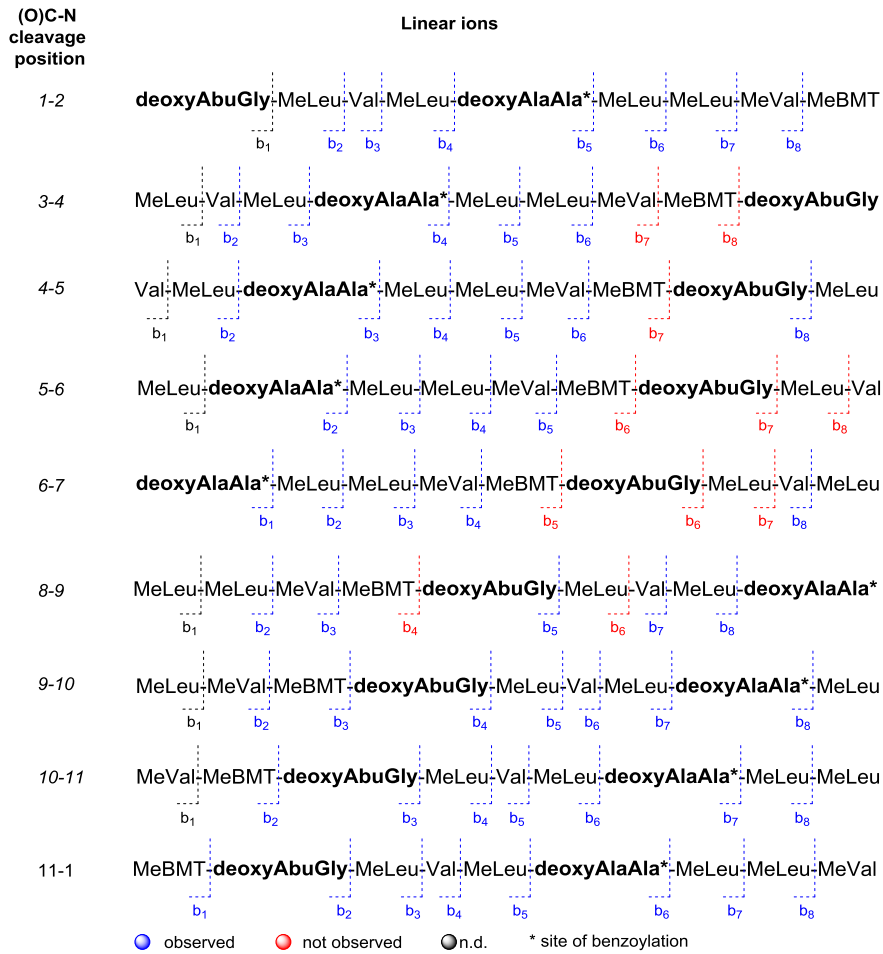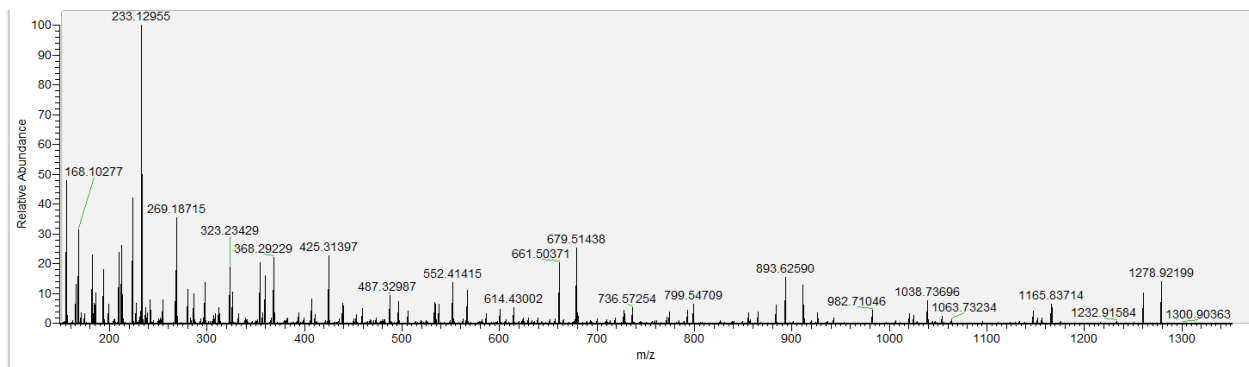

## Representative procedure for silane reductions

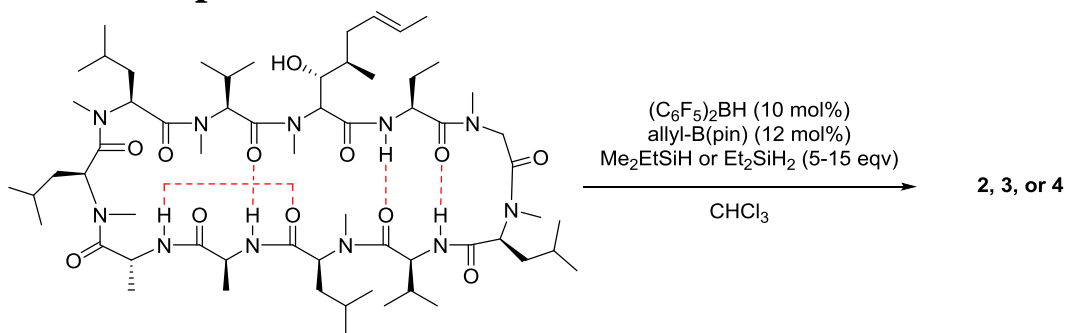

In a nitrogen filled glovebox, a dram vial containing H-B(C<sub>6</sub>F<sub>5</sub>)<sub>2</sub> (1.7 mg, 0.005 mmol) was diluted with 200  $\mu$ L CHCl<sub>3</sub> before adding allyl-Bpin (1.1  $\mu$ L, 0.006 mmol). After complete dissolution of the suspension (c.a 5 min), silane (see below) was added and the solution transferred to a separate vial containing the cyclosporine A (0.060 g, 0.05 mmol) dissolved in 200  $\mu$ L CHCl<sub>3</sub>. The vial which contained the catalyst/silane mixture was rinsed with an additional 100  $\mu$ L CHCl<sub>3</sub> and transferred to the reaction flask. After capping the vial with a screw top septum lid (PTFE), the vial was allowed to stir outside of the glovebox for 24h. After the allotted time, the solution was concentrated in vacuo before purifying by column chromatography.

### (2) – 2Abu<sub>deoxy</sub>-CsA-OSiMe<sub>2</sub>Et

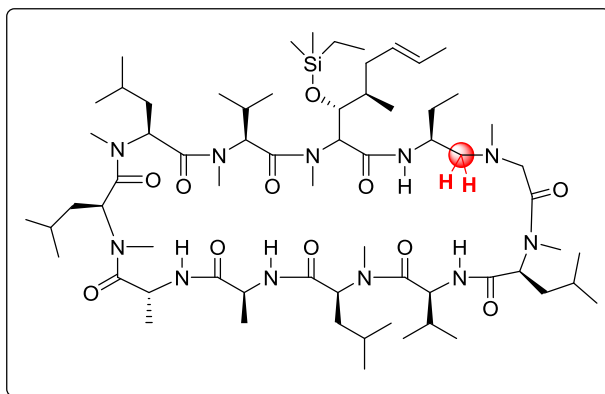

15 eqv. Me<sub>2</sub>EtSiH (99  $\mu$ L), (SiO<sub>2</sub>, hexane:acetone 4:1→3:1→2:1→1:1→1:3)

21.7 mg (35 % yield), white solid

HRMS (ESI) calcd for C<sub>66</sub>H<sub>124</sub>N<sub>11</sub>O<sub>11</sub>Si (M+H)<sup>+</sup> : 1274.92511. Found: 1274.92441.

See MS<sup>2</sup> characterization in previous section

In the <sup>1</sup>H-NMR spectrum (500 MHz, CD<sub>3</sub>CN) below the amide region displays two sets of secondary amide resonances (two conformers), further suggesting the reduction of Abu2 (tertiary amide) over Ala7 (secondary amide)



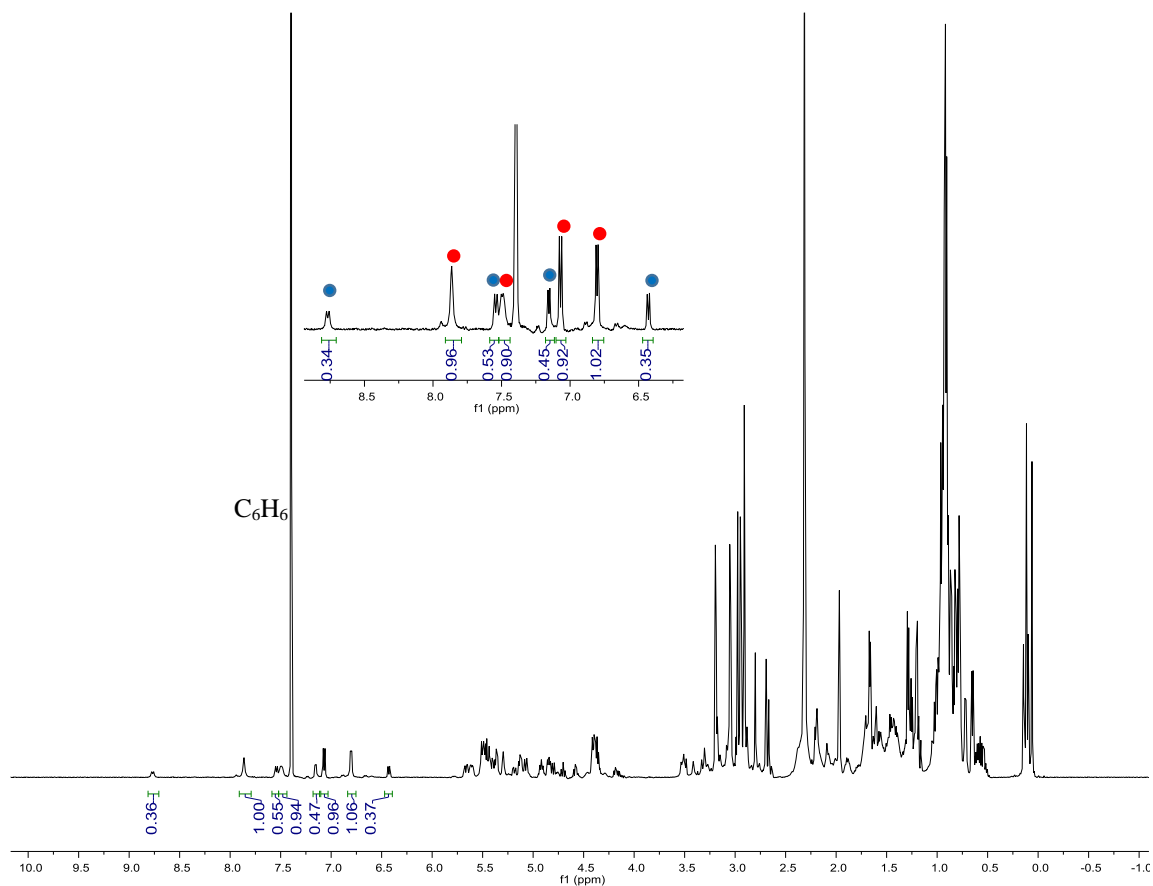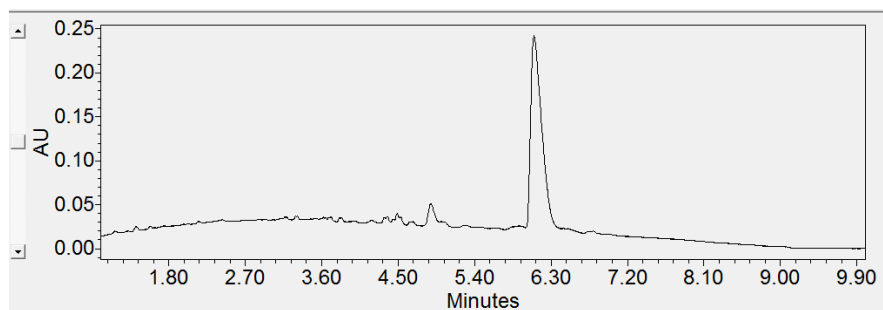

**(2) – 2Abudeoxy-7Aladeoxy-CsA-OSiMe<sub>2</sub>Et**

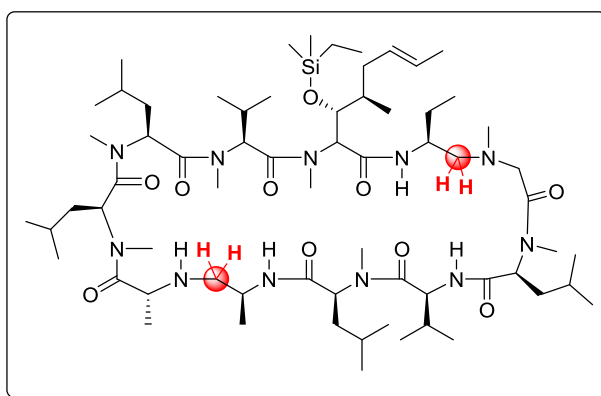

15 eqv. Me<sub>2</sub>EtSiH (99 μL), (SiO<sub>2</sub>, hexane:acetone 4:1→3:1→2:1→1:1→1:3)

27.2 mg (44 % yield), white solid

<sup>1</sup>H NMR (700 MHz, C<sub>6</sub>D<sub>6</sub>) δ 8.06 (d, *J* = 3.0 Hz, 1H), 7.44 (d, *J* = 9.5 Hz, 1H), 7.10 (d, *J* = 6.3 Hz, 1H), 6.03 (dd, *J* = 9.6, 5.3 Hz, 1H), 5.96 (d, *J* = 2.1 Hz, 1H), 5.92 (dd, *J* = 12.8, 3.1 Hz, 1H), 5.74 (d, *J* = 10.6 Hz, 1H), 5.53 – 5.50 (m, 2H), 5.43 (t, *J* = 7.4 Hz, 1H), 5.22 (dd, *J* = 9.8, 6.5 Hz, 1H), 5.12 (dd, *J* = 9.5, 4.3 Hz, 1H), 4.94 (dd, *J* = 8.7, 2.0 Hz, 1H), 4.15 – 4.07 (m, 1H), 3.79 (m, 1H), 3.57 (s, 3H), 3.51 (s, 3H), 3.11 (q, *J* = 6.9 Hz, 1H), 2.92 (s, 3H), 2.74 – 2.70 (m, 1H), 2.70 (s, 3H), 2.64 (s, 3H), 2.40 (s, 3H), 1.83 (s, 3H), 1.13 – 1.04 (m, 24H), 1.03 – 0.95 (m, 23H), 0.94 – 0.86 (m, 14H), 0.38 (s, 6H).

<sup>13</sup>C NMR (176 MHz, C<sub>6</sub>D<sub>6</sub>) δ 176.8, 173.0, 172.5, 171.6, 171.4, 171.3, 171.2, 170.4, 169.8, 130.8, 126.8, 77.7, 60.0, 59.9, 58.89, 58.87, 57.4, 55.2, 54.79, 54.76, 53.8, 53.4, 51.4, 49.9, 46.2, 42.2, 39.9, 38.8, 38.4, 38.3, 36.9, 36.4, 36.2, 34.0, 30.8, 30.5, 30.1, 29.7, 29.1, 26.9, 26.3, 25.5, 25.4, 25.3, 24.8, 24.4, 24.0, 23.6, 22.74, 22.70, 22.5, 22.4, 21.0, 20.0, 19.9, 19.4, 18.9, 18.6, 18.2, 17.2, 15.9, 9.7, 9.7, 7.5, -1.1, -1.6.

HRMS (ESI) calcd for C<sub>66</sub>H<sub>125</sub>N<sub>11</sub>O<sub>10</sub>Si (M+H)<sup>+</sup> : 1260.94584. Found: 1260.94598.

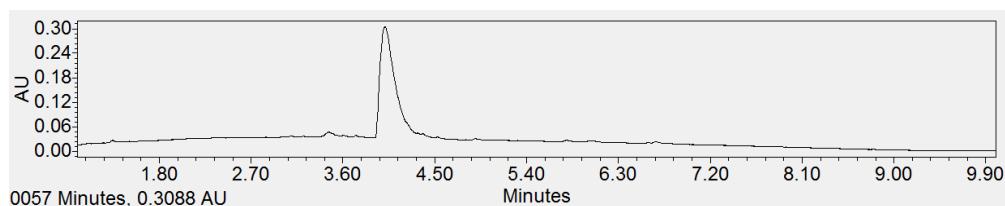

### **(3) – 1MeBmT<sub>deoxy</sub>-CsA-OSi**

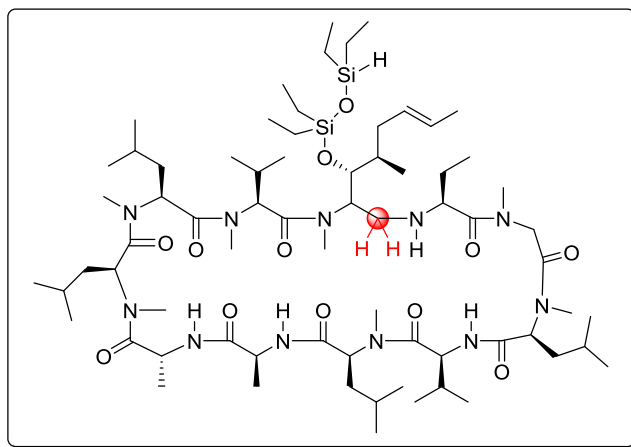

5 eqv. Et<sub>2</sub>SiH<sub>2</sub> (32 μL). (SiO<sub>2</sub>, hexane:acetone 4:1→3:1→2:1→1:1→1:3)

40.3 mg (62 % yield), white solid

<sup>1</sup>H NMR (600 MHz, C<sub>6</sub>D<sub>6</sub>) δ 7.64 (d, *J* = 8.9 Hz, 1H), 7.46 (d, *J* = 6.8 Hz, 1H), 7.02 (d, *J* = 7.4 Hz, 1H), 5.88 (dd, *J* = 10.9, 3.7 Hz, 1H), 5.73 – 5.64 (m, 2H), 5.63 – 5.57 (m, 1H), 5.56 – 5.50 (m, 3H), 5.48 (dd, *J* = 10.8, 4.8 Hz, 1H), 4.93 – 4.91 (m, 1H), 4.89 (d, *J* = 6.9 Hz, 1H), 4.86 (d, *J* = 9.0

Hz, 1H), 4.74 (dd,  $J = 7.1$  Hz, 1H), 4.17 (d,  $J = 14.4$  Hz, 1H), 4.02 (dd,  $J = 7.9, 4.1$  Hz, 1H), 3.47 (s, 3H), 3.15 (s, 4H), 2.99 (s, 3H), 2.97 (s, 3H), 2.96 (s, 4H), 2.79 (s, 3H), 2.52 (s, 3H), 1.77 – 1.73 (m, 6H), 1.64 – 1.57 (m, 2H), 1.50 – 1.42 (m, 1H), 1.32 (d,  $J = 6.6$  Hz, 3H), 1.28 – 1.16 (m, 16H), 1.11 – 1.02 (m, 15H), 0.99 – 0.94 (m, 9H), 0.91 (dd,  $J = 11.9, 6.5$  Hz, 9H), 0.83 (q,  $J = 7.4, 6.6$  Hz, 7H), 0.77 – 0.72 (m, 7H).

$^{13}\text{C}$  NMR (151 MHz,  $\text{C}_6\text{D}_6$ )  $\delta$  178.4, 173.9, 173.1, 172.6, 171.7, 171.5, 170.6, 170.4, 169.7, 169.2, 130.8, 126.8, 79.2, 59.6, 58.1, 57.6, 55.0, 54.9, 54.2, 53.9, 50.3, 50.2, 48.7, 48.4, 45.2, 42.2, 39.7, 38.3, 37.9, 37.4, 36.4, 36.3, 31.6, 30.9, 30.3, 30.2, 30.0, 29.7, 28.4, 28.0, 25.6, 25.32, 25.28, 25.0, 24.6, 23.8, 23.64, 23.59, 23.11, 23.05, 22.1, 21.8, 19.7, 19.52, 19.45, 19.2, 18.4, 18.1, 16.7, 15.6, 10.6, 7.54, 7.50, 7.48, 7.41, 7.1, 6.98, 6.96, 6.90, 5.9.

HRMS (ESI) calcd for  $\text{C}_{70}\text{H}_{134}\text{N}_{11}\text{O}_{11}\text{Si}_2$  ( $\text{M}+\text{H}$ ) $^+$  : 1376.97520. Found: 1376.97457.

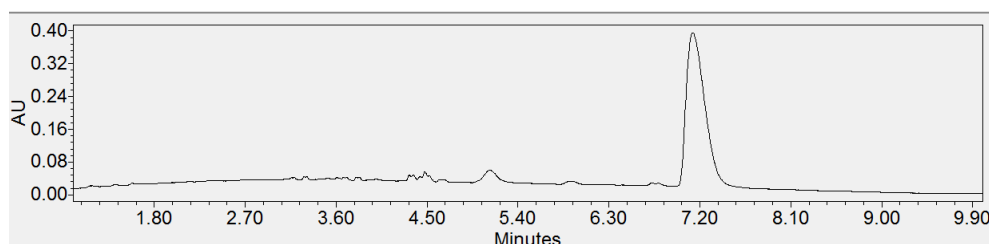

## Representative alkylation procedure

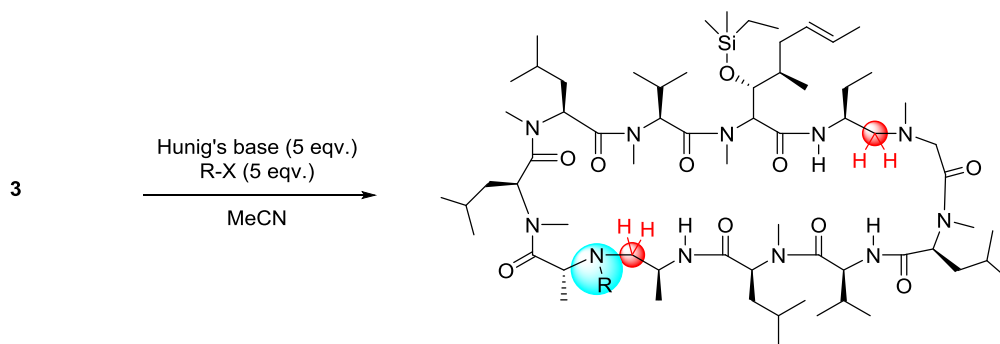

A dram vial containing **3**, (0.020 mg, 0.0015 mmol) was sealed with a PTFE lined septum cap after exchanging the atmosphere with nitrogen (x3) MeCN (0.5 mL) was added. Hunig's base was then added followed by the alkylating agent (see below). After 24 hours, the solution was diluted with EtOAc and washed with saturated  $\text{NaHCO}_3(\text{aq})$  (x2), and brine (x1) before drying over  $\text{Na}_2\text{SO}_4$ . After concentrating *in vacuo*, the residue was then purified by column chromatography.

### (3a) – 2Abu<sub>deoxy</sub>-7Ala<sub>deoxy</sub>allyl-CsA-OSiMe<sub>2</sub>Et

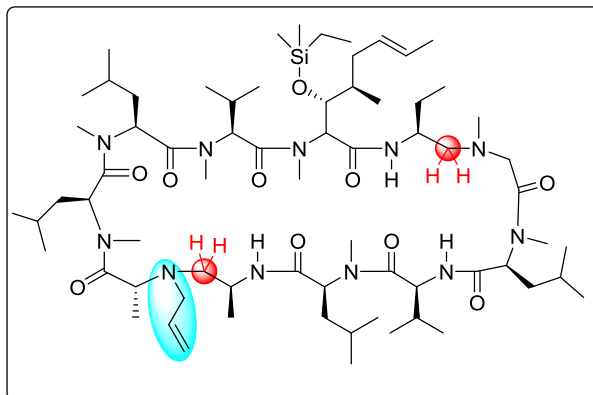

Allyl bromide (7  $\mu$ L). (SiO<sub>2</sub>, hexane:acetone 4:1→3:1→2:1→1:1→1:3)

10.2 mg (47% yield), white solid

<sup>1</sup>H NMR (600 MHz, C<sub>6</sub>D<sub>6</sub>)  $\delta$  8.30 (d, *J* = 4.3 Hz, 1H), 8.11 (d, *J* = 2.9 Hz, 1H), 7.60 (d, *J* = 9.5 Hz, 1H), 6.11 (dd, *J* = 9.8, 4.9 Hz, 1H), 5.99 (d, *J* = 1.9 Hz, 1H), 5.81 (dd, *J* = 12.8, 2.5 Hz, 1H), 5.78 (d, *J* = 10.6 Hz, 1H), 5.68 – 5.60 (m, 1H), 5.55 (t, *J* = 7.8 Hz, 1H), 5.53 – 5.49 (m, 2H), 5.17 (m, 2H), 5.03 – 4.93 (m, 3H), 3.97 – 3.90 (m, 1H), 3.81 (m, 1H), 3.53 (s, 3H), 3.51 (s, 3H), 3.39 (d, *J* = 6.7 Hz, 1H), 3.06 – 2.94 (m, 2H), 2.93 (s, 3H), 2.88 (s, 3H), 2.80 (d, *J* = 16.7 Hz, 1H), 2.65 (s, 3H), 2.49 (s, 3H), 2.43 (t, *J* = 12.3 Hz, 1H), 2.32 – 2.24 (m, 1H), 2.13 (tt, *J* = 6.9, 3.5 Hz, 1H), 2.09 – 2.00 (m, 1H), 1.82 (s, 4H), 1.22 – 1.12 (m, 15H), 1.12 – 1.06 (m, 11H), 1.06 – 1.00 (m, 12H), 1.00 – 0.89 (m, 30H), 0.40 (s, 3H), 0.39 (s, 3H).

<sup>13</sup>C NMR (151 MHz, C<sub>6</sub>D<sub>6</sub>)  $\delta$  175.1, 172.9, 172.2, 171.6, 171.30, 171.27, 171.01, 170.96, 169.9, 134.8, 130.8, 126.7, 117.8, 77.7, 60.1, 59.9, 58.8, 57.4, 57.0, 54.7, 54.0, 53.3, 52.1, 49.9, 45.2, 42.2, 39.9, 38.6, 38.4, 38.3, 37.2, 36.91, 36.88, 36.6, 33.8, 30.7, 30.5, 30.2, 30.08, 30.06, 29.4, 26.8, 26.4, 25.5, 25.3, 25.2, 25.1, 24.8, 24.6, 24.2, 23.6, 23.0, 22.62, 22.57, 22.3, 20.8, 20.0, 19.8, 18.7, 18.3, 18.2, 17.1, 16.0, 14.4, 9.8, 9.7, 7.5, -1.1, -1.6.

HRMS (ESI) calcd for C<sub>69</sub>H<sub>130</sub>N<sub>11</sub>O<sub>10</sub>Si (M+H)<sup>+</sup> : 1300.97714. Found: 1300.97754.

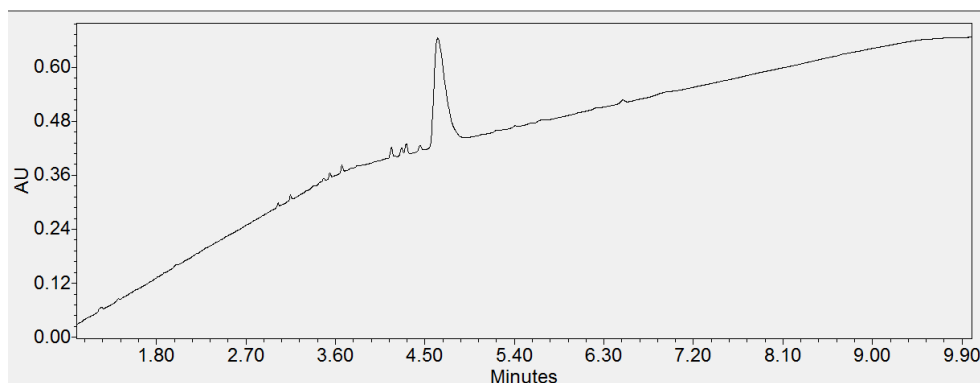

**(3b) – 2Abu<sub>deoxy</sub>-7Ala<sub>deoxy</sub>propargyl-CsA-OSiMe<sub>2</sub>Et**

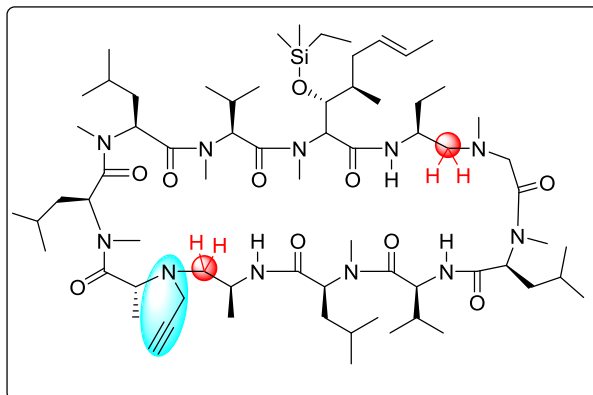

Propargyl bromide, 80% solution in toluene (9  $\mu$ L). (SiO<sub>2</sub>, hexane:acetone 4:1→3:1→2:1→1:1→1:3)  
 10.7 mg (50% yield), white solid

<sup>1</sup>H NMR (600 MHz, C<sub>6</sub>D<sub>6</sub>)  $\delta$  8.11 (s, 1H), 8.04 (s, 1H), 7.55 (d,  $J$  = 9.4 Hz, 1H), 6.14 (t,  $J$  = 7.5 Hz, 1H), 5.98 (s, 1H), 5.81 (d,  $J$  = 12.1 Hz, 1H), 5.76 (d,  $J$  = 10.6 Hz, 1H), 5.55 – 5.48 (m, 3H), 5.21 – 5.14 (m, 2H), 4.95 (d,  $J$  = 8.8 Hz, 1H), 3.84 – 3.75 (m, 2H), 3.60 (d,  $J$  = 6.6 Hz, 1H), 3.54 (s, 3H), 3.51 (d,  $J$  = 1.9 Hz, 3H), 3.25 (d,  $J$  = 18.4 Hz, 1H), 3.15 (d,  $J$  = 18.6 Hz, 1H), 2.90 (d,  $J$  = 1.9 Hz, 3H), 2.83 (d,  $J$  = 2.0 Hz, 3H), 2.80 (d,  $J$  = 9.0 Hz, 1H), 2.65 (d,  $J$  = 1.9 Hz, 3H), 2.53 (d,  $J$  = 1.9 Hz, 3H), 2.41 (d,  $J$  = 12.3 Hz, 1H), 2.33 – 2.23 (m, 1H), 2.14 – 2.05 (m, 2H), 2.06 – 1.99 (m, 2H), 1.82 (s, 3H), 1.65 (s, 3H), 1.59 (d,  $J$  = 7.6 Hz, 3H), 1.22 – 1.11 (m, 17H), 1.11 – 1.01 (m, 17H), 1.01 – 0.86 (m, 39H), 0.39 (s, 6H).

<sup>13</sup>C NMR (151 MHz, C<sub>6</sub>D<sub>6</sub>)  $\delta$  174.1, 172.6, 172.0, 171.1, 171.0, 170.9, 170.8, 170.4, 169.5, 130.5, 126.3, 78.1, 77.3, 72.7, 59.7, 59.5, 58.5, 58.4, 58.1, 57.4, 57.1, 54.2, 53.6, 53.0, 51.6, 49.6, 43.8, 41.8, 39.6, 38.2, 38.05, 37.98, 36.5, 36.3, 36.2, 33.6, 30.2, 30.1, 29.9, 29.6, 29.5, 29.0, 26.5, 26.1, 25.2, 25.0, 24.8, 24.3, 24.2, 23.9, 23.2, 22.6, 22.2, 22.1, 21.6, 20.3, 19.6, 19.5, 18.3, 17.89, 17.86, 16.5, 15.9, 15.6, 9.4, 9.3, 7.1, -1.4, -2.0.

HRMS (ESI) calcd for C<sub>69</sub>H<sub>128</sub>N<sub>11</sub>O<sub>10</sub>Si (M+H)<sup>+</sup>: 1298.96149. Found: 1298.96132.

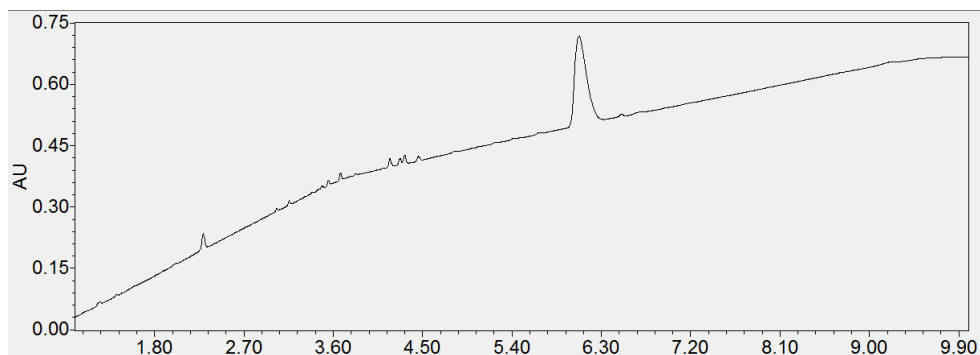

**(3c) – 2Abu<sub>deoxy</sub>-7Ala<sub>deoxy</sub>-benzyl-CsA-OSiMe<sub>2</sub>Et**

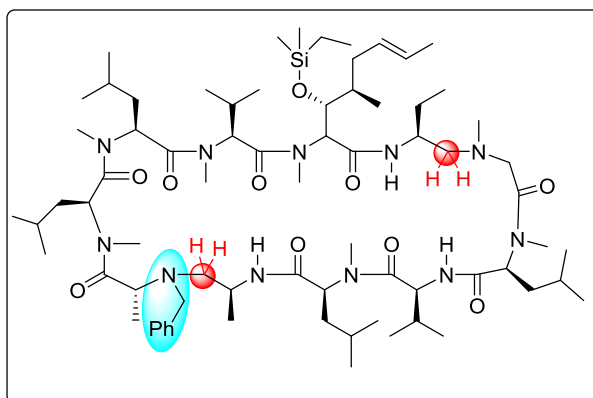

Benzyl bromide (18  $\mu$ L). (SiO<sub>2</sub>, hexane:acetone 4:1→3:1→2:1→1:1→1:3)

18.4 mg (43% yield), white solid

<sup>1</sup>H NMR (600 MHz, C<sub>6</sub>D<sub>6</sub>)  $\delta$  8.45 (s, 1H), 8.10 (s, 1H), 7.58 (d, *J* = 9.4 Hz, 1H), 7.34 (d, *J* = 7.5 Hz, 2H), 7.25 (t, *J* = 7.5 Hz, 2H), 6.06 (dd, *J* = 9.4, 5.1 Hz, 1H), 5.98 (s, 1H), 5.84 (dd, *J* = 12.7, 2.9 Hz, 1H), 5.78 (d, *J* = 10.6 Hz, 1H), 5.60 (t, *J* = 7.8 Hz, 1H), 5.57 – 5.43 (m, 2H), 5.28 – 5.11 (m, 2H), 4.96 (dd, *J* = 8.8, 1.9 Hz, 1H), 3.89 – 3.72 (m, 2H), 3.52 (s, 3H), 3.49 (s, 3H), 3.39 – 3.33 (m, 1H), 3.30 (q, *J* = 6.4 Hz, 1H), 2.91 (s, 6H), 2.79 (d, *J* = 16.7 Hz, 1H), 2.65 (s, 3H), 2.62 (d, *J* = 17.0 Hz, 1H), 2.42 (t, *J* = 12.2 Hz, 1H), 2.34 (s, 3H), 2.30 – 2.22 (m, 1H), 2.18 – 2.10 (m, 1H), 1.82 (s, 3H), 1.19 – 1.01 (m, 30H), 1.02 – 0.70 (m, 27H), 0.40 (s, 3H), 0.40 (s, 3H).

<sup>13</sup>C NMR (151 MHz, C<sub>6</sub>D<sub>6</sub>)  $\delta$  174.5, 172.5, 171.9, 171.0, 170.92, 170.89, 170.81, 170.4, 169.5, 140.8, 130.5, 129.5, 127.0, 126.4, 77.4, 59.7, 59.5, 58.5, 57.0, 56.5, 54.5, 53.7, 53.1, 51.6, 49.5, 45.4, 41.9, 39.5, 38.3, 38.1, 38.0, 37.3, 36.5, 36.2, 33.3, 32.0, 30.5, 30.1, 29.9, 29.8, 29.7, 29.5, 29.0, 26.5, 26.0, 25.1, 25.0, 25.0, 24.7, 24.4, 24.2, 23.7, 23.4, 23.3, 22.8, 22.7, 22.5, 22.3, 20.5, 19.6, 19.3, 18.3, 17.9, 17.8, 17.0, 15.6, 9.4, 9.3, 7.2, -1.4, -2.0.

One aryl resonance missing in <sup>1</sup>H spectrum

HRMS (ESI) calcd for C<sub>73</sub>H<sub>132</sub>N<sub>11</sub>O<sub>10</sub>Si (M+H)<sup>+</sup> : 1350.99279. Found: 1350.99317.

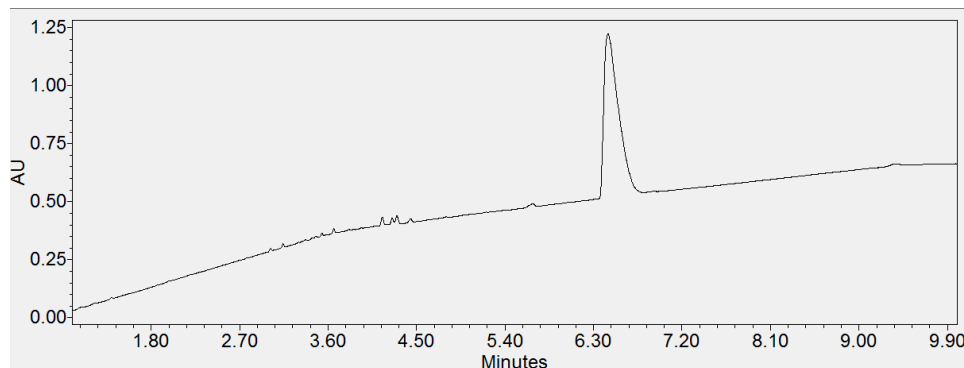

**(3d) – 2Abu<sub>deoxy</sub>-7Ala<sub>deoxy</sub>benzoyl-CsA-OSiMe<sub>2</sub>Et**

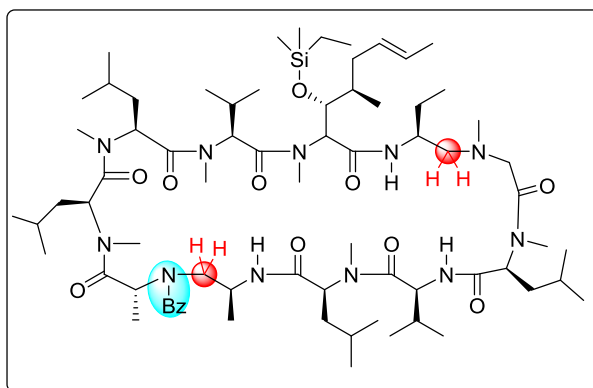

Benzoyl chloride(9  $\mu$ L). (SiO<sub>2</sub>, hexane:acetone 4:1→3:1→2:1→1:1→1:3)

15.5 mg (66% yield), white solid

HRMS (ESI) calcd for C<sub>73</sub>H<sub>130</sub>N<sub>11</sub>O<sub>11</sub>Si (M+H)<sup>+</sup> : 1364.97206. Found: 1364.97217.

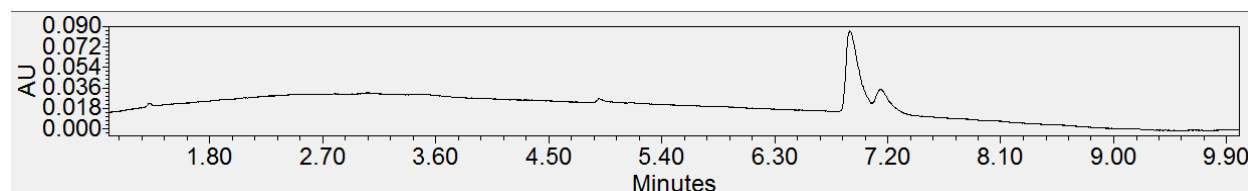

**3d**'s NMR spectrum was complex due to multiple conformers. LCMS analysis indicates two major species with the same m/z. MS<sup>2</sup> analysis (see previous section) shows good agreement with the assigned structure.

The analogous 4-fluoro benzoyl analog was synthesized to examine the number of potential isomers by NMR. The <sup>19</sup>F-spectrum acquired in MeOH or iPrOH indicate that 2 major and one minor conformer exist. Variable temperature NMR studies indicated that the two conformers were not in fast exchange even at temperatures of 75 °C, although the relative population of each conformer was dependent on temperature and reversible. (See NMR spectra below)

$^{19}\text{F}$  NMR (470 MHz) of **3d**'s 4-Fluoroanalog in *i*PrOH.

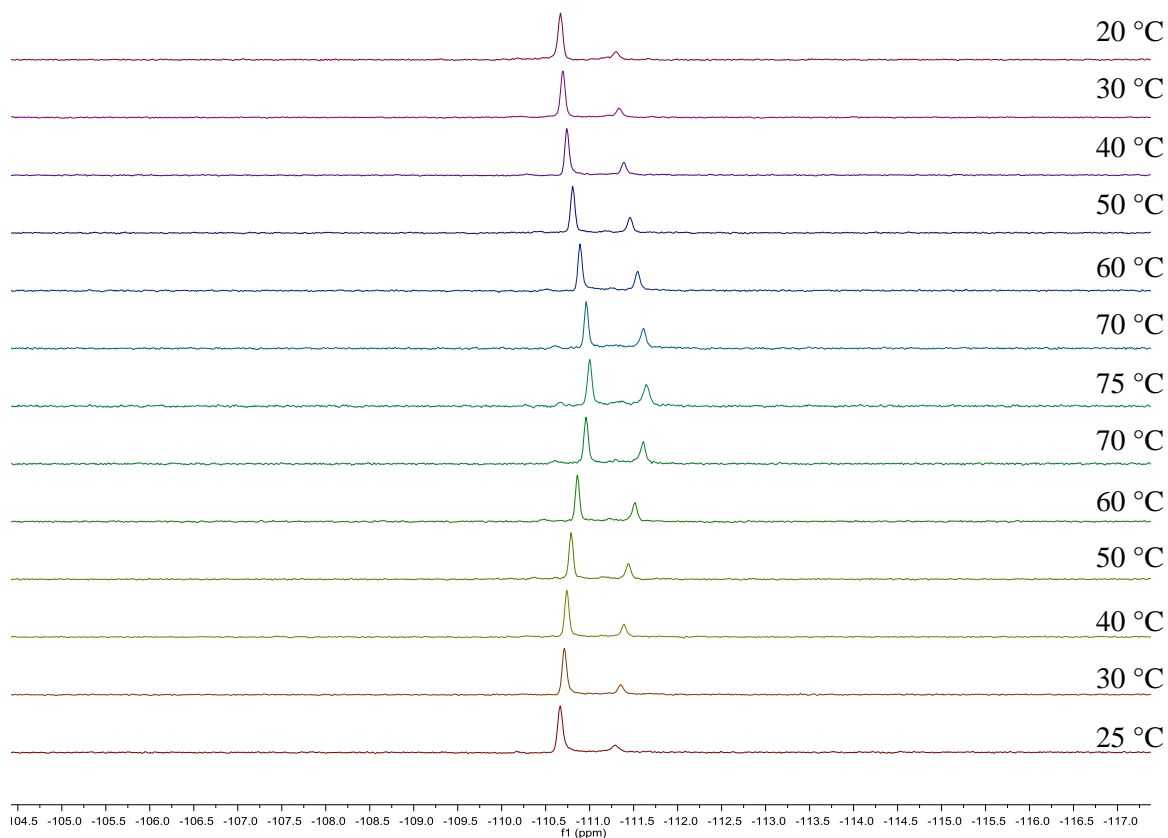

## Reductive cyanation procedure

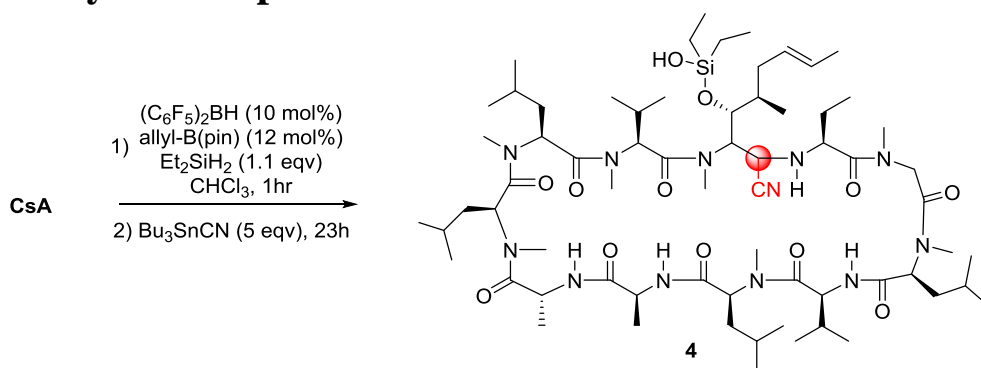

In a nitrogen filled glovebox, a dram vial containing  $\text{H-B}(\text{C}_6\text{F}_5)_2$  (1.7 mg, 0.005 mmol) was diluted with 200  $\mu\text{L}$   $\text{CHCl}_3$  before adding allyl-Bpin (1.1  $\mu\text{L}$ , 0.006 mmol). After complete dissolution of the suspension (c.a 5 min), silane (see below) was added and the solution transferred to a separate vial containing the cyclosporine A (0.060 g, 0.05 mmol) dissolved in 200  $\mu\text{L}$   $\text{CHCl}_3$ . The vial which contained the catalyst/silane mixture was rinsed with an additional 100  $\mu\text{L}$   $\text{CHCl}_3$  and transferred to the reaction flask. After capping the vial with a screw top septum lid (PTFE), the vial was allowed to stir inside of the glovebox for 1h. Tributyltin cyanide was then added (0.080 g, 0.25 mmol) and the flask recapped before stirring outside of the glovebox for 24h. After



the allotted time, the solution was concentrated under a stream of nitrogen gas before purifying by column chromatography.

(SiO<sub>2</sub>, hexane:acetone 4:1→3:1→2:1→1:1→1:3)

28.0 mg (43% yield), white solid

<sup>1</sup>H NMR (600 MHz, C<sub>6</sub>D<sub>6</sub>) δ 8.33 (d, *J* = 7.0 Hz, 1H), 7.83 (d, *J* = 8.0 Hz, 1H), 7.80 (d, *J* = 9.3 Hz, 1H), 5.89 (dd, *J* = 11.1, 3.6 Hz, 1H), 5.75 – 5.72 (m, 2H), 5.53 (ddd, *J* = 15.9, 11.3, 4.3 Hz, 3H), 5.51 – 5.44 (m, 1H), 5.40 (t, *J* = 6.9 Hz, 1H), 5.32 – 5.27 (m, 1H), 5.14 (dd, *J* = 9.3, 7.7 Hz, 1H), 5.05 (d, *J* = 11.0 Hz, 1H), 4.84 – 4.79 (m, 1H), 4.67 (d, *J* = 7.1 Hz, 1H), 4.45 (t, *J* = 3.1 Hz, 1H), 4.36 (dd, *J* = 8.3, 3.2 Hz, 1H), 3.97 – 3.91 (m, 1H), 3.81 (d, *J* = 14.3 Hz, 1H), 3.73 (s, 3H), 3.06 (s, 3H), 3.05 (s, 3H), 3.04 (s, 3H), 2.97 (s, 3H), 2.84 (s, 3H), 2.42 (s, 3H), 2.37 – 2.28 (m, 3H), 1.99 (dt, *J* = 9.8, 6.4, 3.4 Hz, 1H), 1.88 (dt, *J* = 13.6, 10.1 Hz, 1H), 1.81 (dd, *J* = 6.4, 1.6 Hz, 3H), 1.69 – 1.60 (m, 3H), 1.59 (d, *J* = 7.2 Hz, 3H), 1.28 – 1.20 (m, 15H), 1.16 (dd, *J* = 13.7, 6.6 Hz, 7H), 1.09 (dd, *J* = 7.1, 5.5 Hz, 6H), 1.05 (d, *J* = 6.5 Hz, 3H), 1.03 – 0.97 (m, 9H), 0.92 (dt, *J* = 8.1, 5.0 Hz, 11H), 0.82 (d, *J* = 5.8 Hz, 4H), 0.75 (t, *J* = 7.4 Hz, 4H), 0.72 (d, *J* = 6.5 Hz, 3H).

<sup>13</sup>C NMR (151 MHz, C<sub>6</sub>D<sub>6</sub>) δ 176.4, 174.9, 174.5, 172.7, 171.8, 171.6, 171.5, 171.0, 170.4, 169.5, 130.7, 126.9, 120.4, 76.4, 60.7, 59.5, 57.7, 56.1, 55.7, 55.3, 54.4, 54.3, 50.3, 48.6, 48.2, 45.0, 41.0, 39.9, 38.5, 37.2, 36.6, 36.5, 35.1, 33.9, 31.9, 31.3, 30.84, 30.81, 30.1, 30.0, 29.5, 26.8, 25.19, 25.18, 25.0, 24.8, 24.7, 24.4, 23.94, 23.92, 23.71, 23.66, 22.2, 22.1, 21.9, 20.8, 19.2, 19.1, 18.4, 18.2, 17.6, 15.5, 10.2, 7.8, 7.7, 7.2, 5.6.

HRMS (ESI) calcd for C<sub>67</sub>H<sub>123</sub>N<sub>12</sub>O<sub>12</sub>Si (M+H)<sup>+</sup>: 1315.91527. Found: 1315.91559.

IR (thin film, cm<sup>-1</sup>) 3317, 2958, 2240, 1682, 1668, 1659, 1651, 1644, 1633

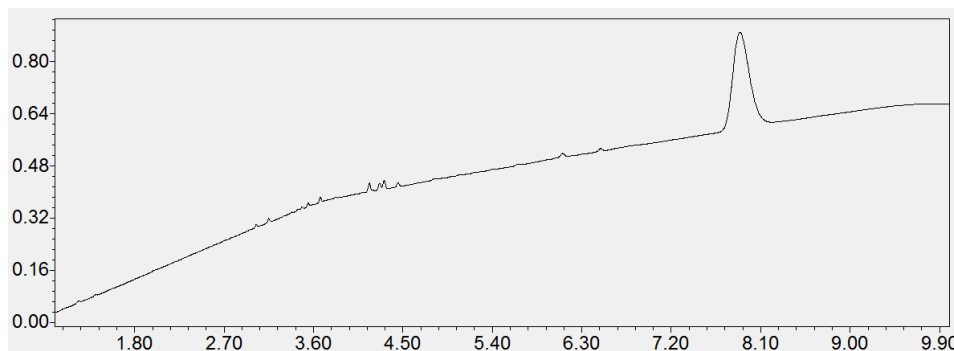

# NMR spectra

$^1\text{H}$  (600 MHz) NMR of **1** in  $\text{C}_6\text{D}_6$  at 25 °C

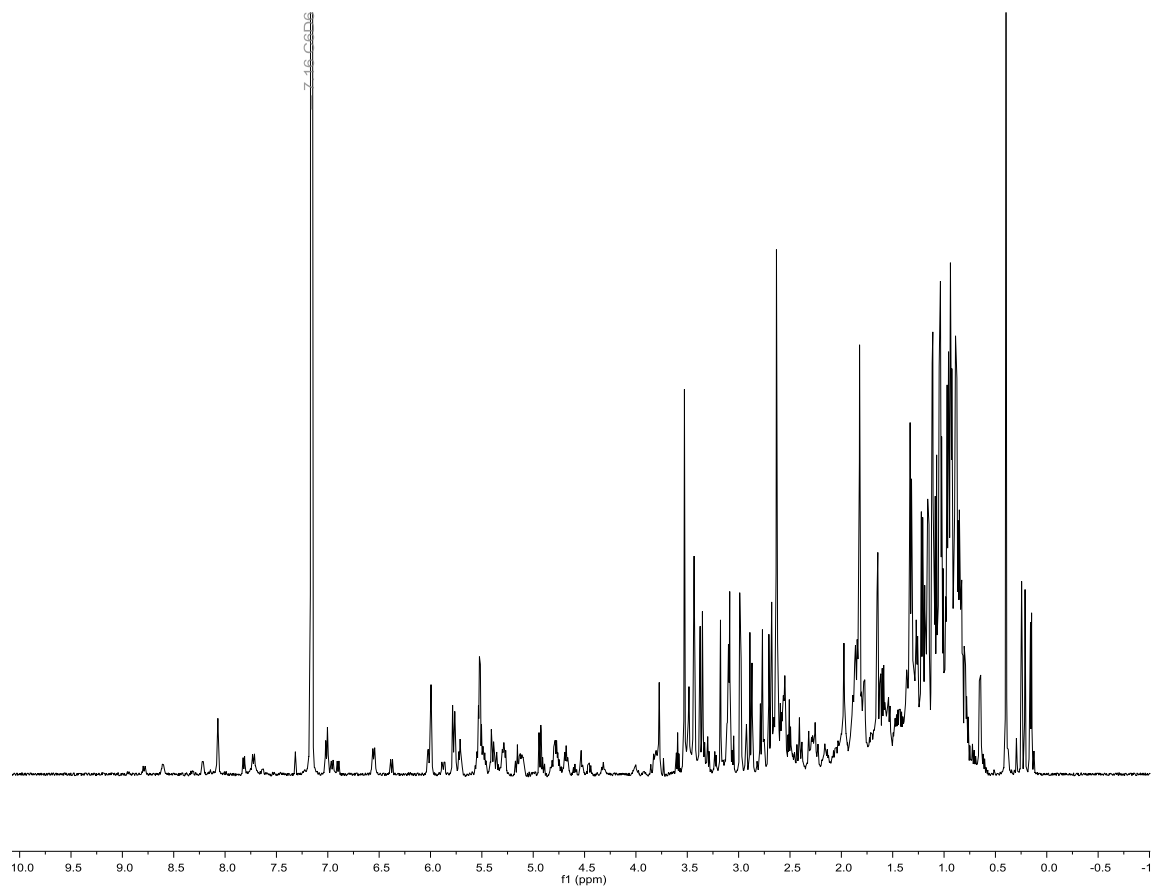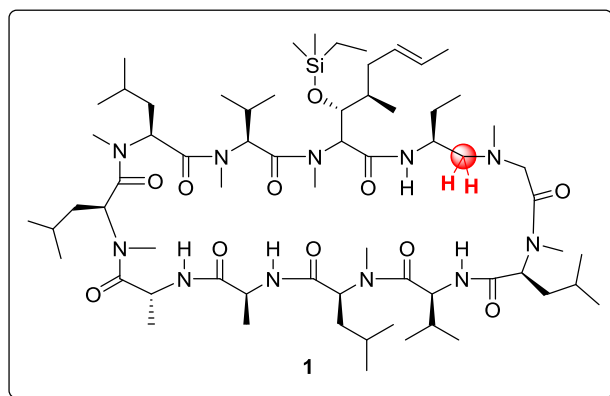

$^1\text{H}$  (700 MHz) and  $^{13}\text{C}\{^1\text{H}\}$  (157 MHz) NMR of **2** in  $\text{C}_6\text{D}_6$  at 25 °C

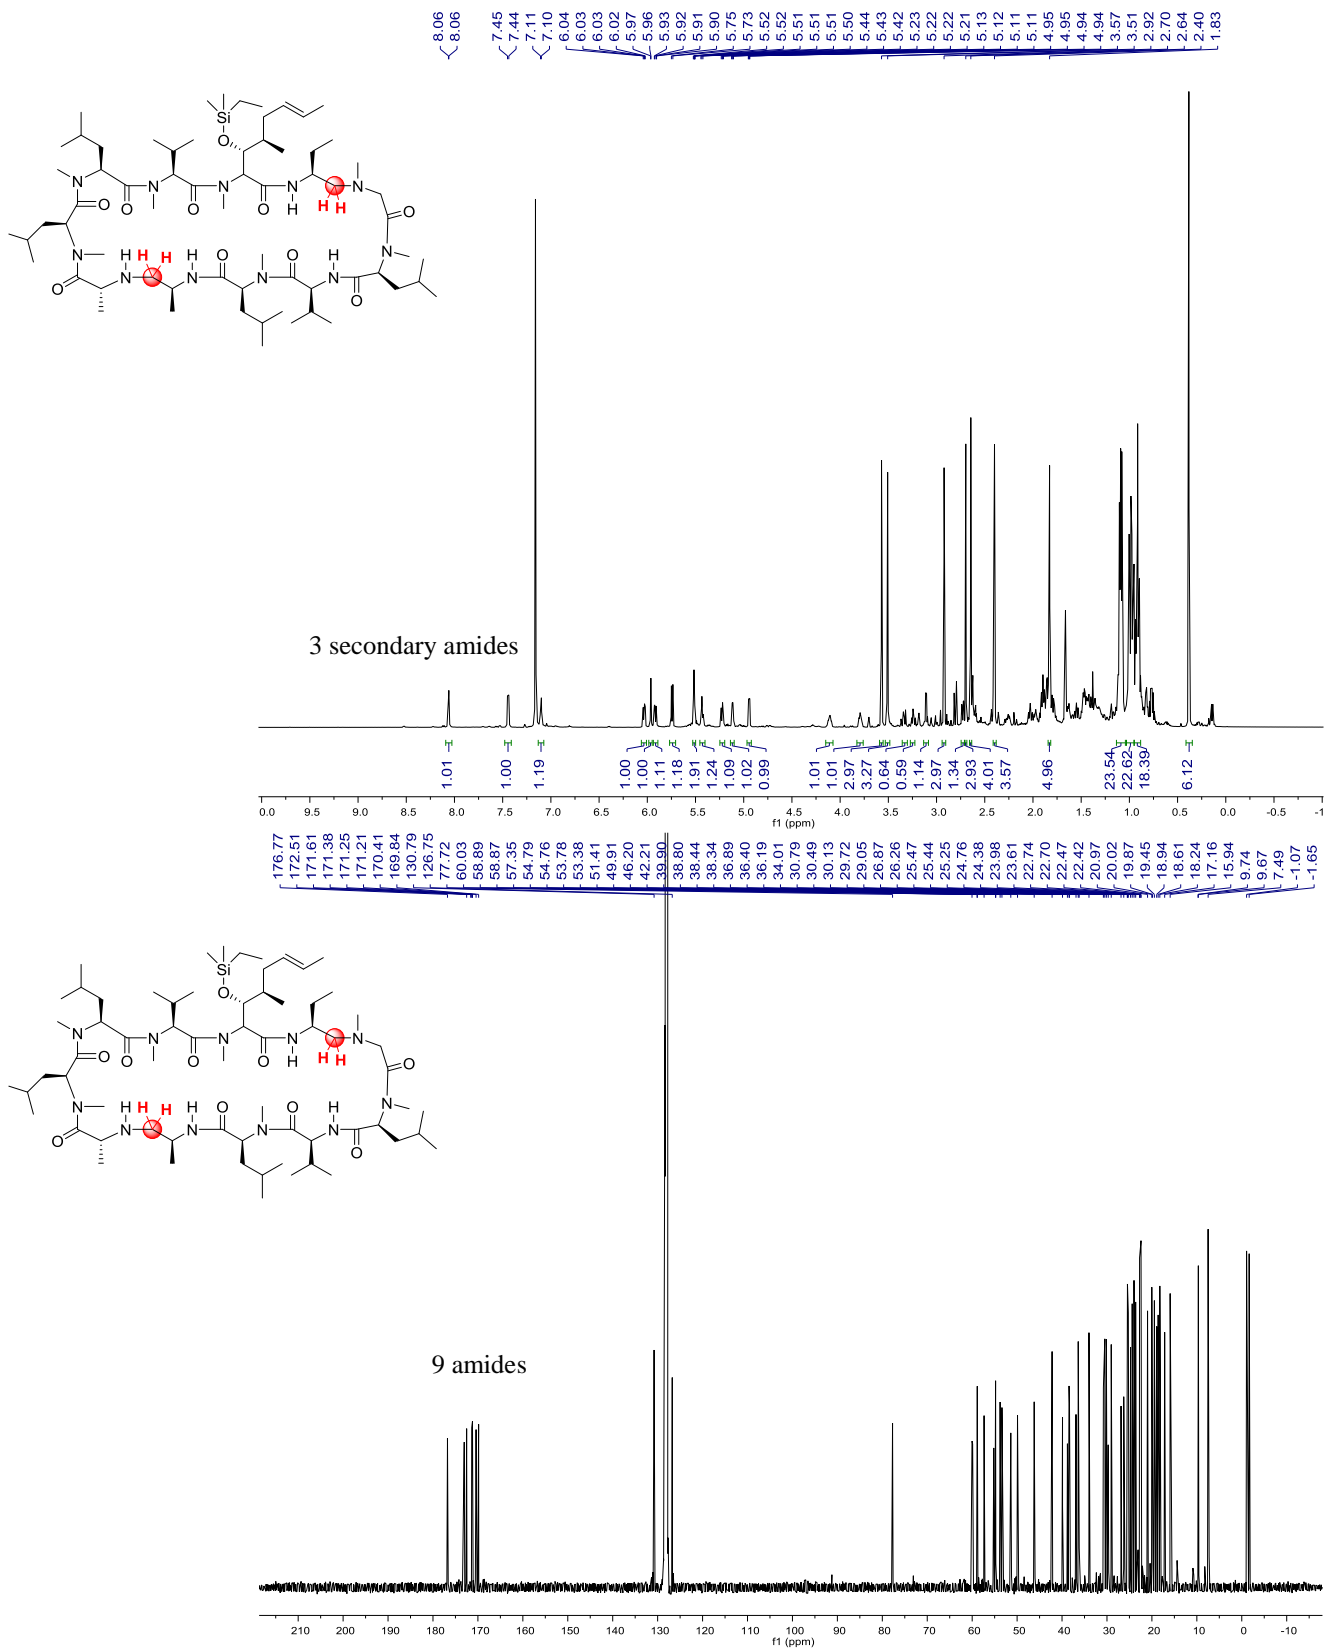

COSY and HSQC of **2** in C<sub>6</sub>D<sub>6</sub> at 25 °C

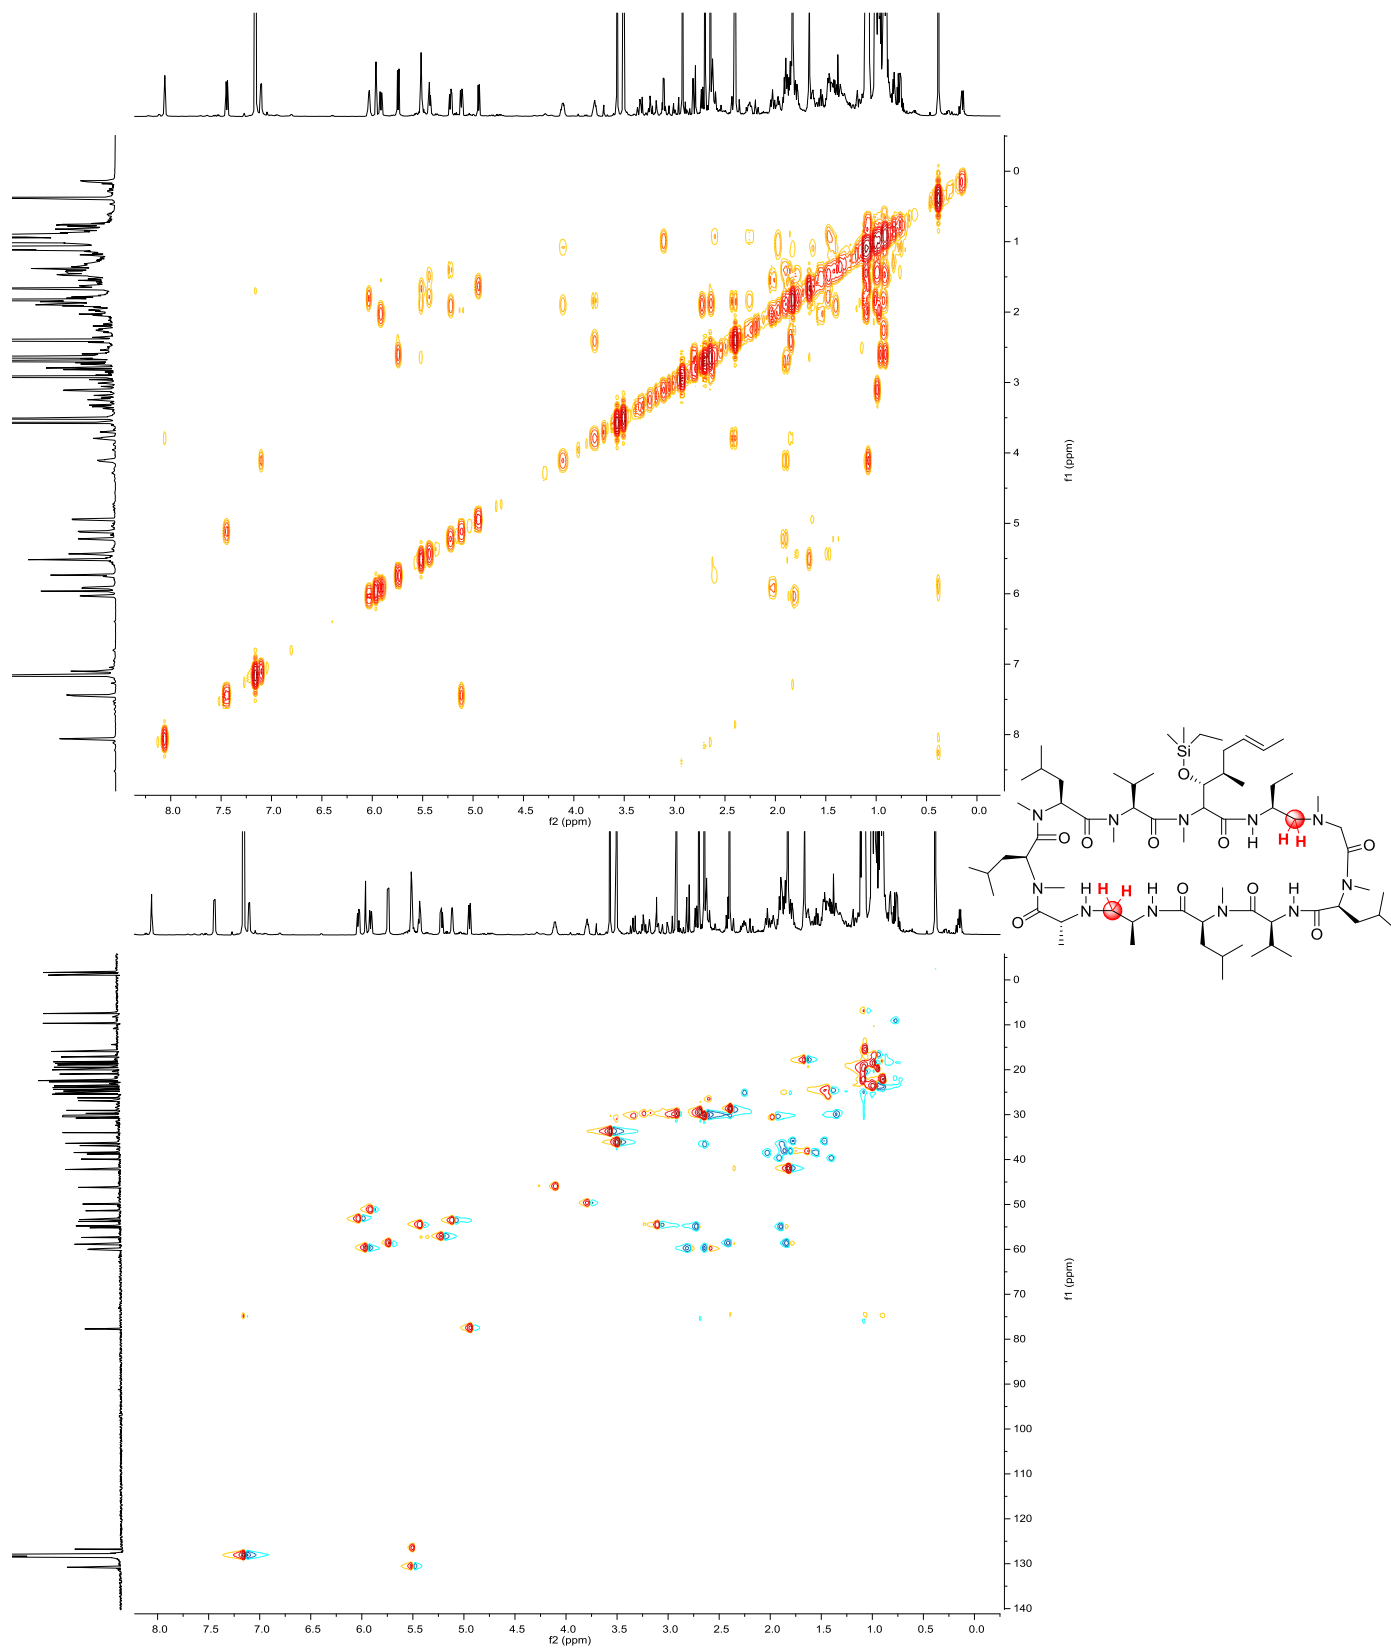

HMBC of **2** in C<sub>6</sub>D<sub>6</sub> at 25 °C

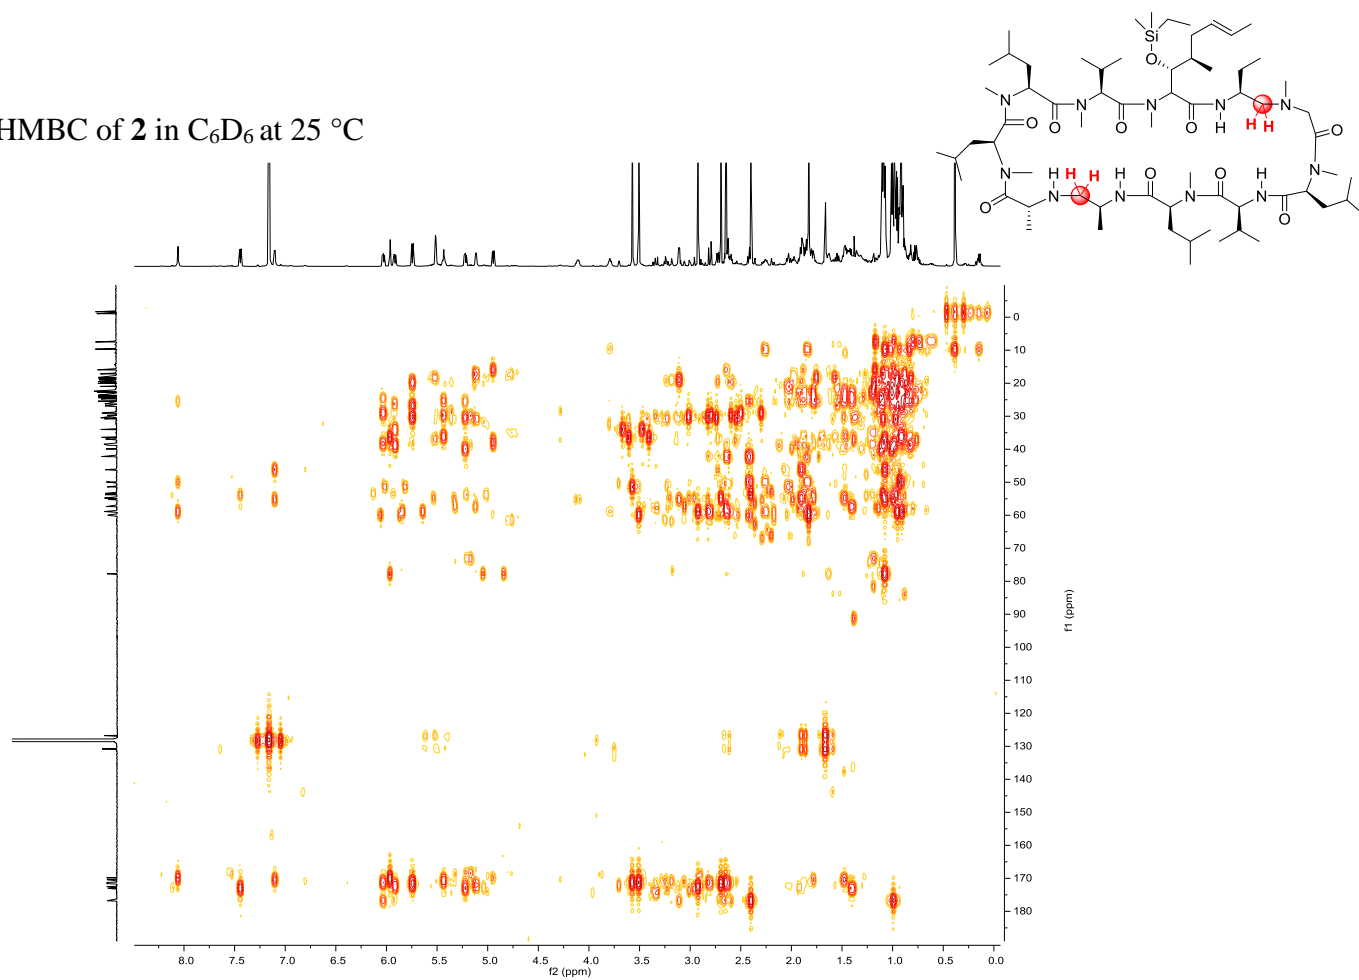

$^1\text{H}$  (600 MHz) and  $^{13}\text{C}$ {H} (151 MHz) NMR of **3** in  $\text{C}_6\text{D}_6$  at 25 °C

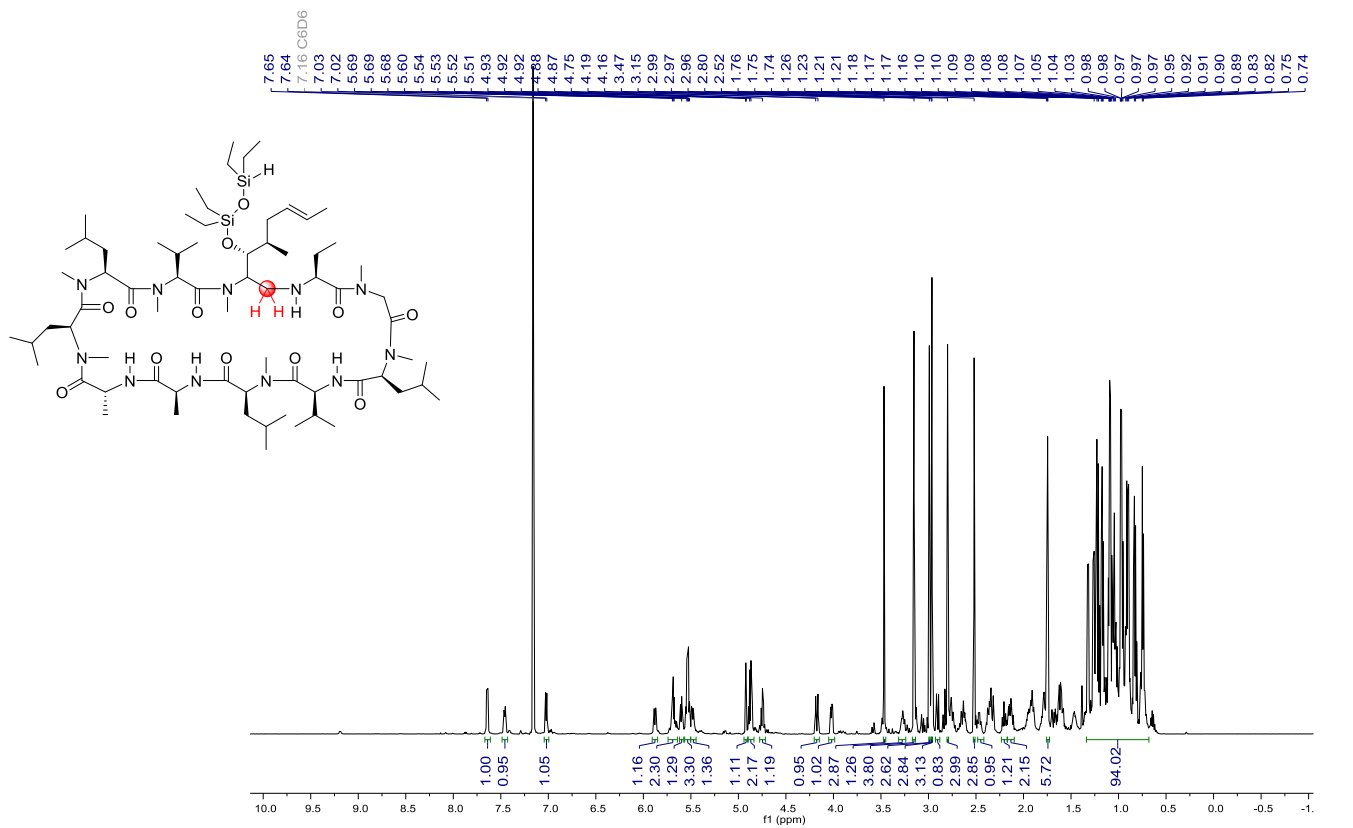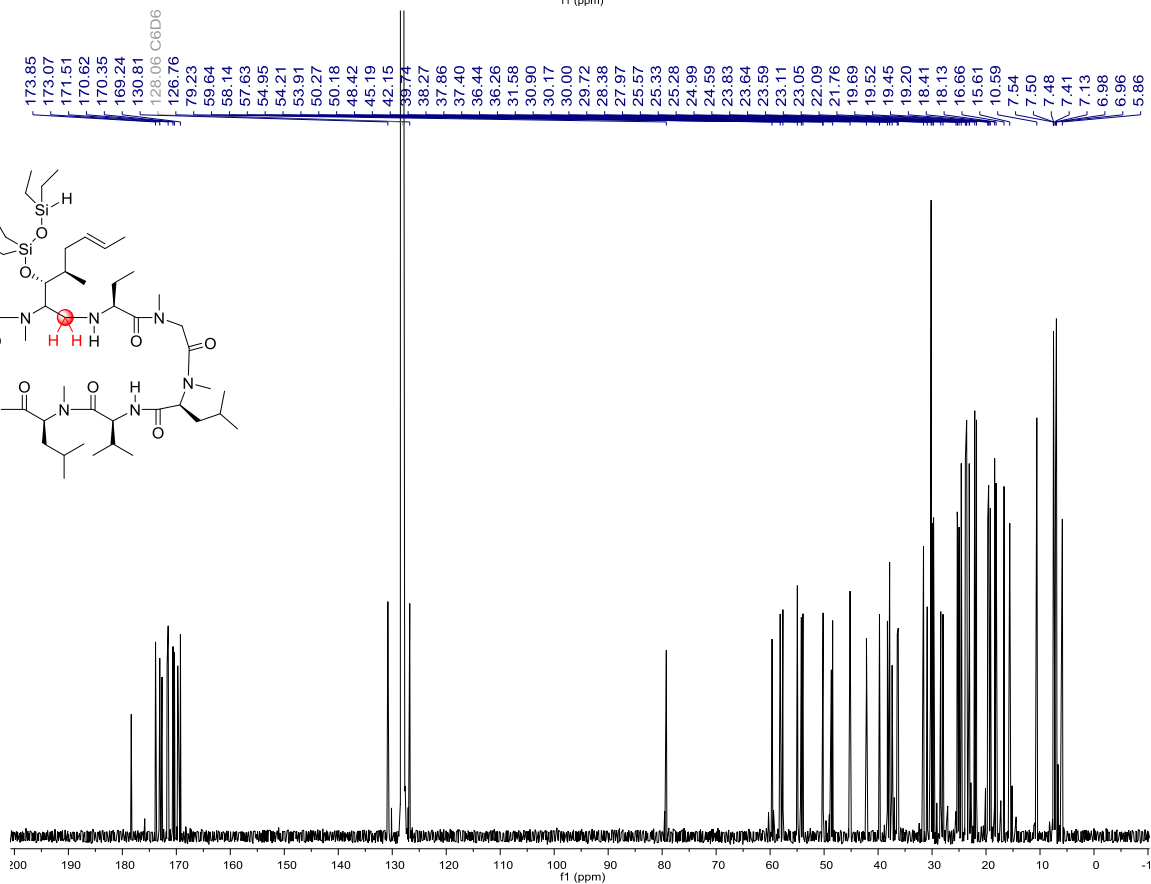

COSY and HSQC of **3** in C<sub>6</sub>D<sub>6</sub> at 25 °C

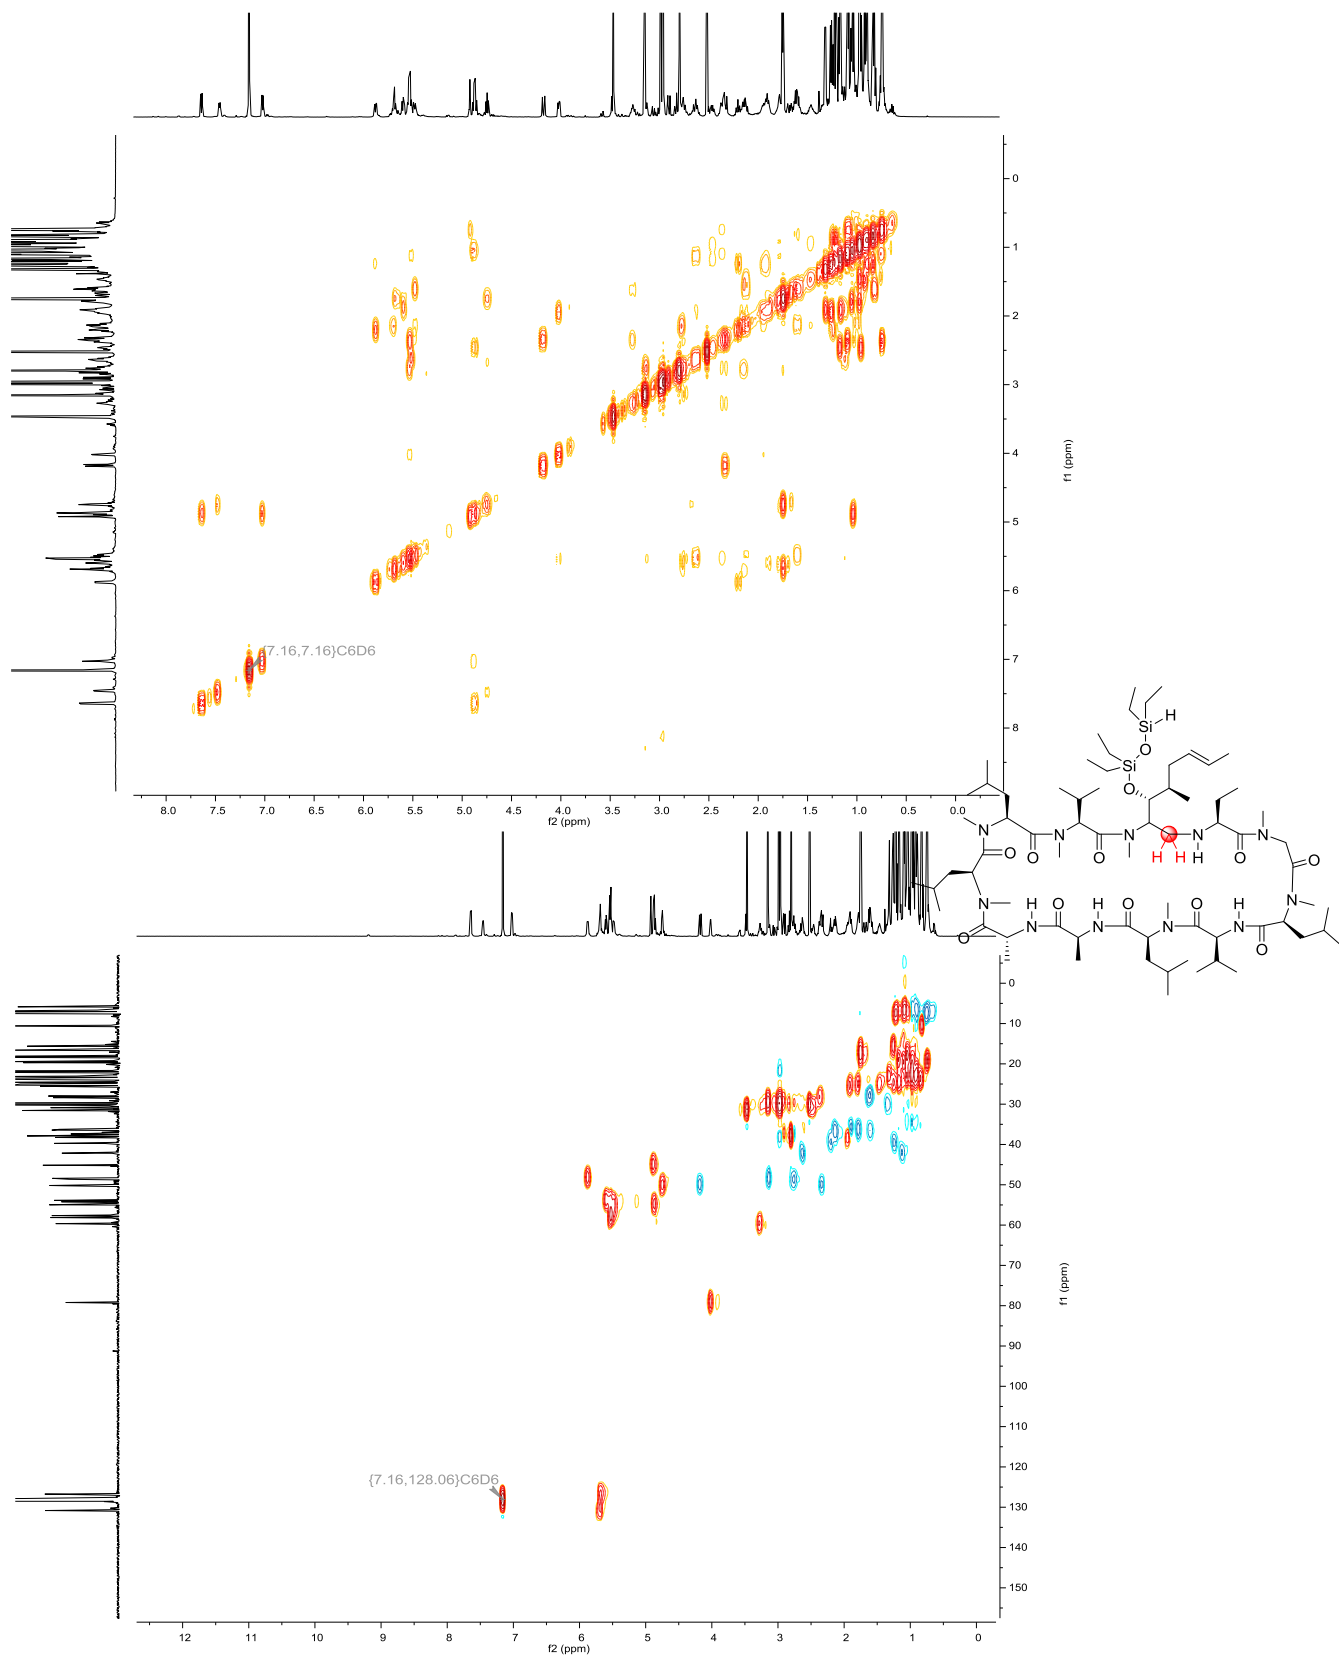

HMBC and 1D-TOCSY of **3** in C<sub>6</sub>D<sub>6</sub> at 25 °C

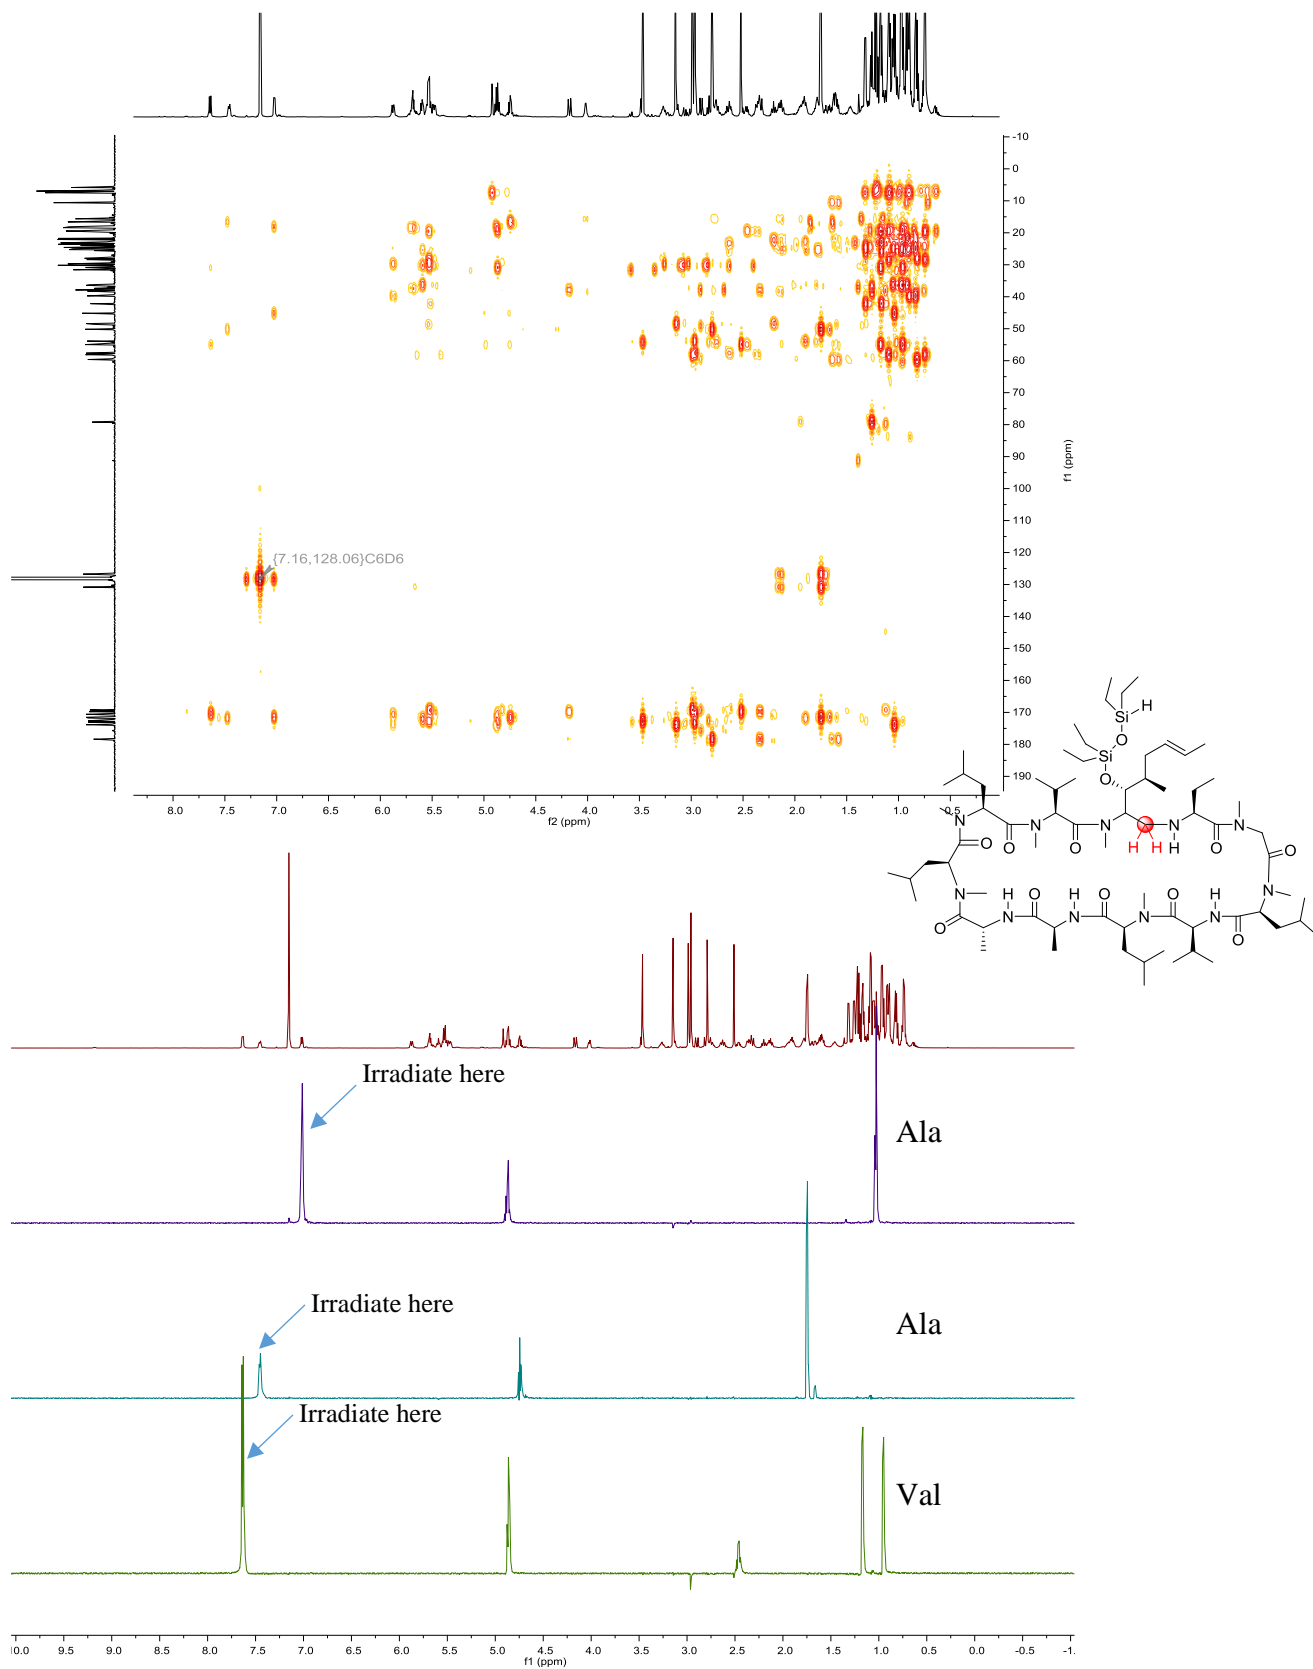



$^1\text{H}$  (600 MHz) and  $^{13}\text{C}\{\text{H}\}$  (151 MHz) NMR of **3a** in  $\text{C}_6\text{D}_6$  at 25 °C

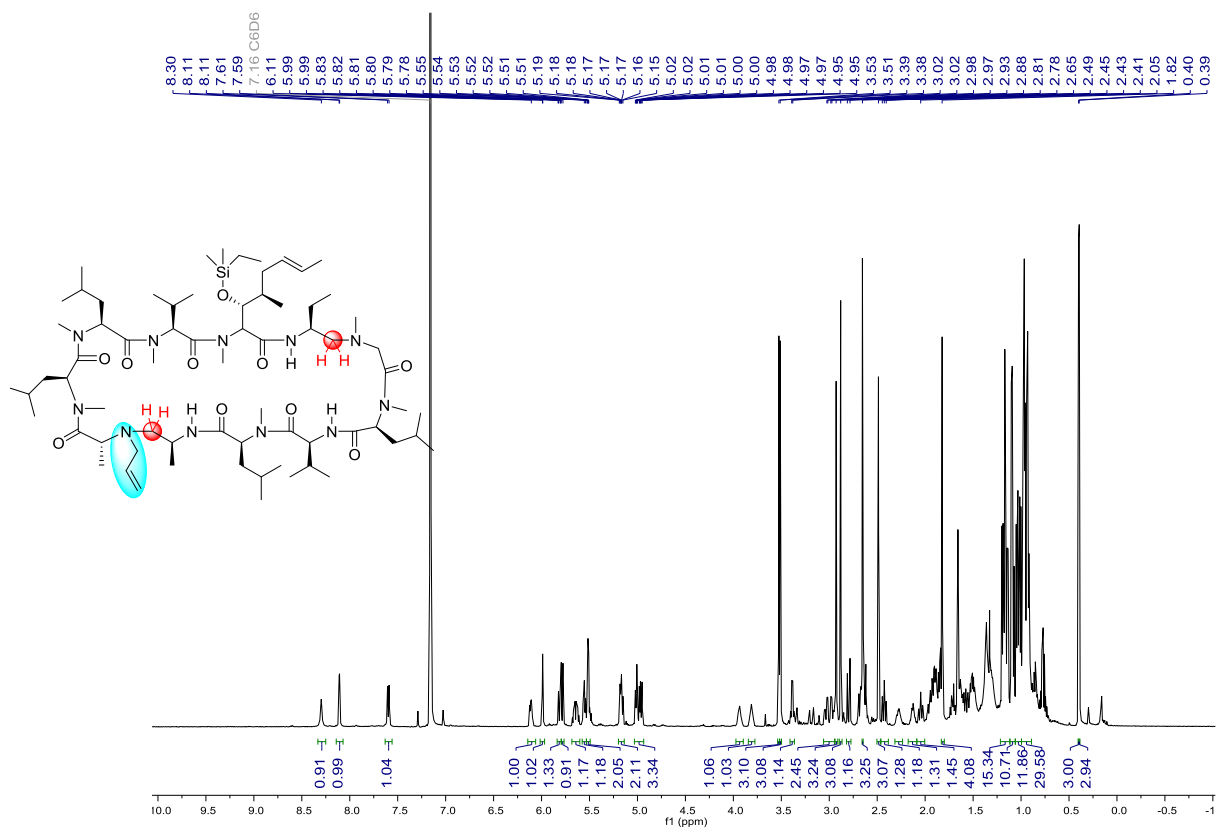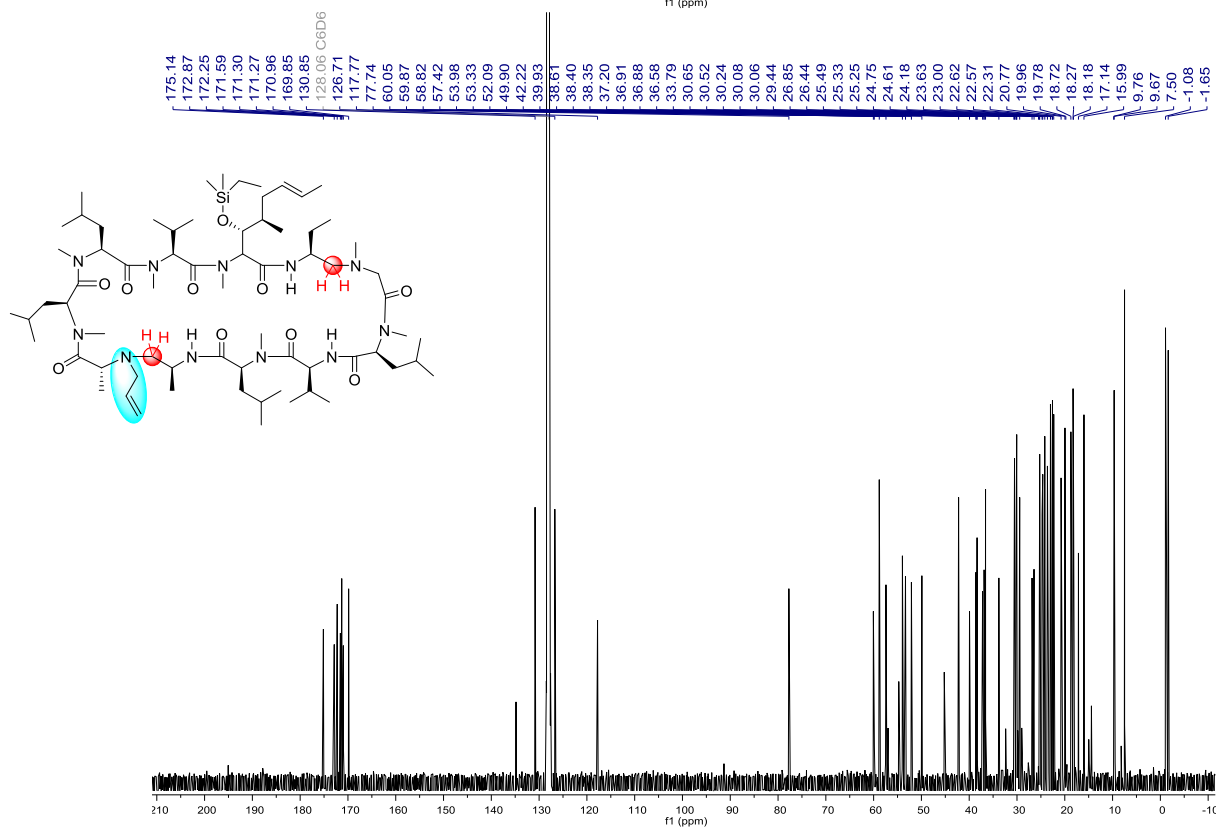

COSY and HSQC of **3a** in C<sub>6</sub>D<sub>6</sub> at 25 °C

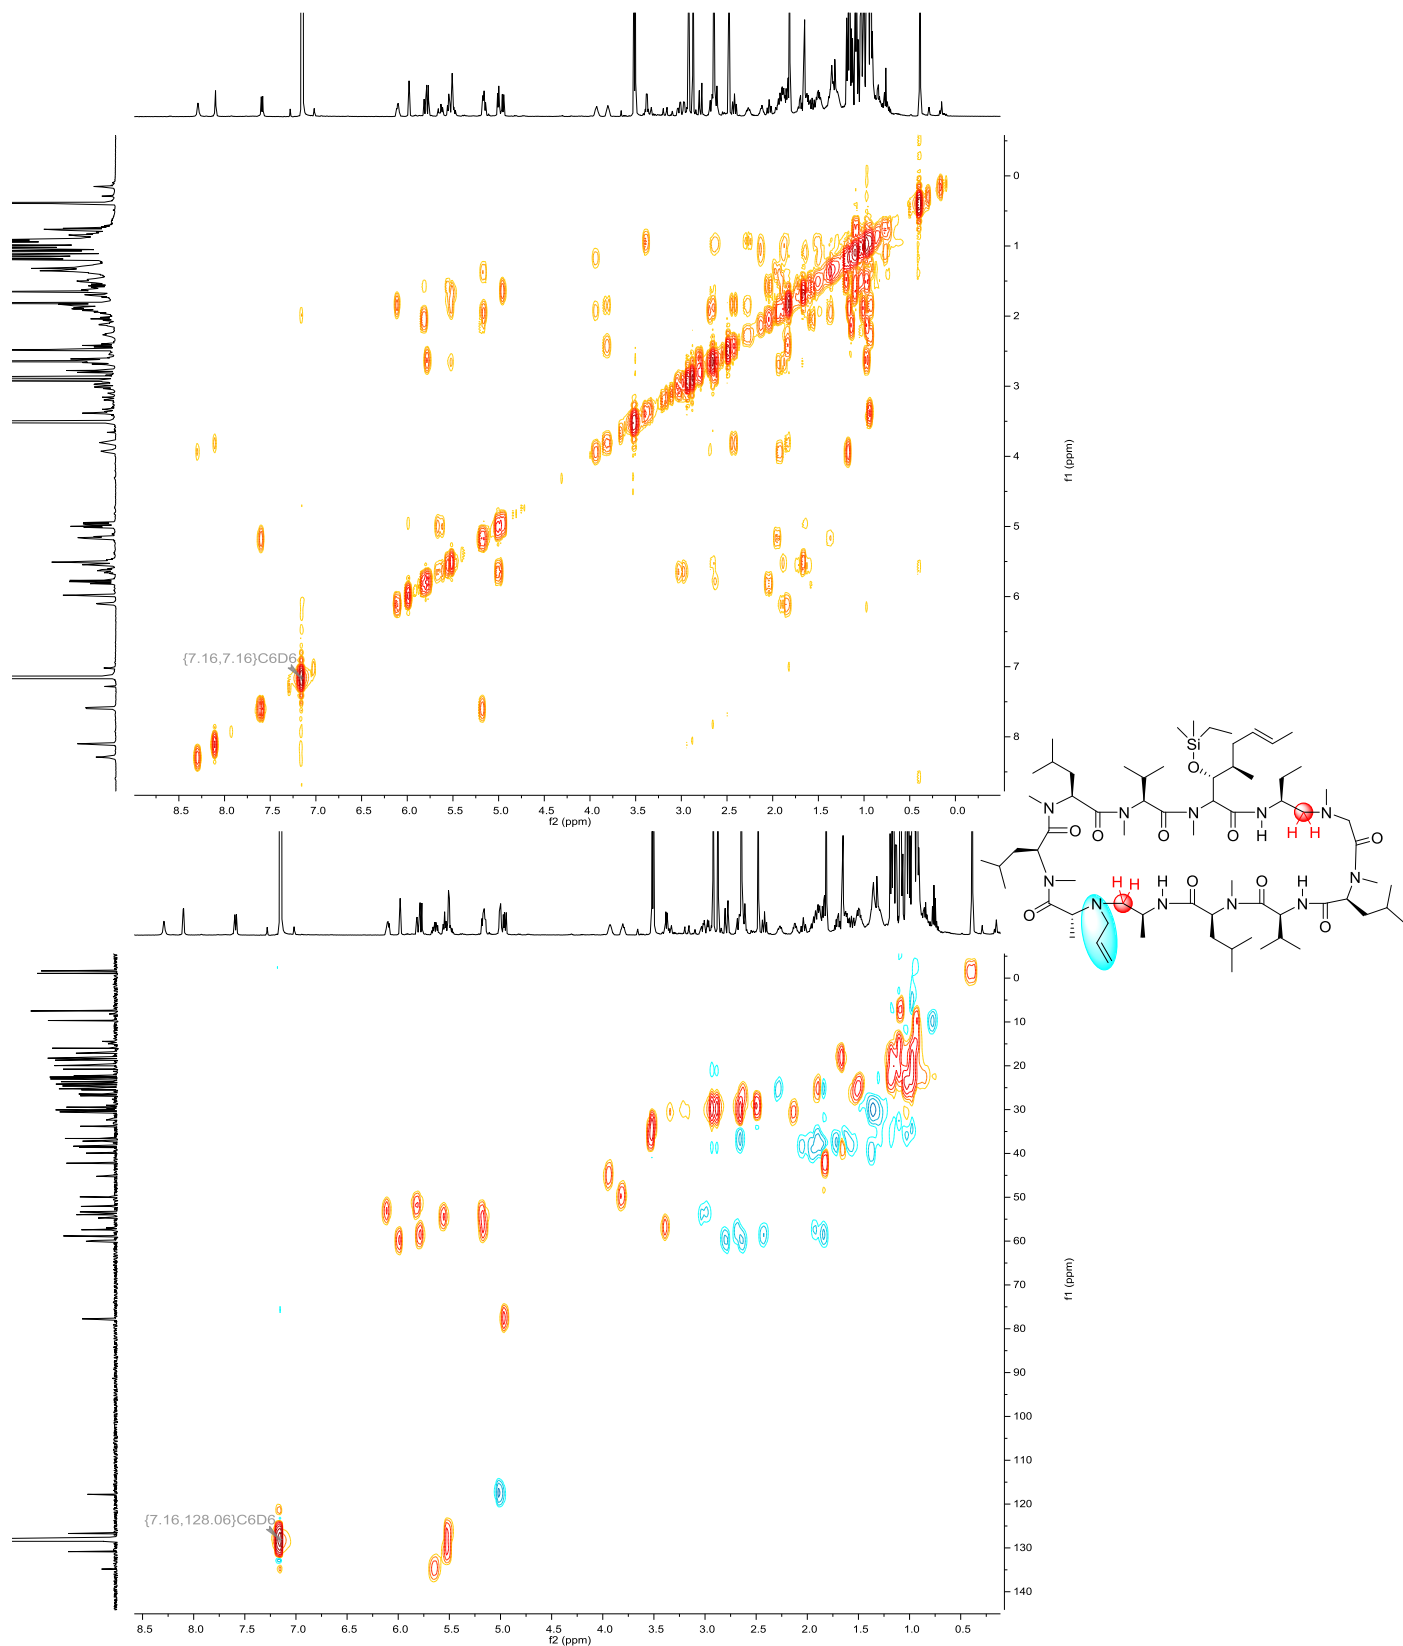

HMBC of **3a** in C<sub>6</sub>D<sub>6</sub> at 25 °C

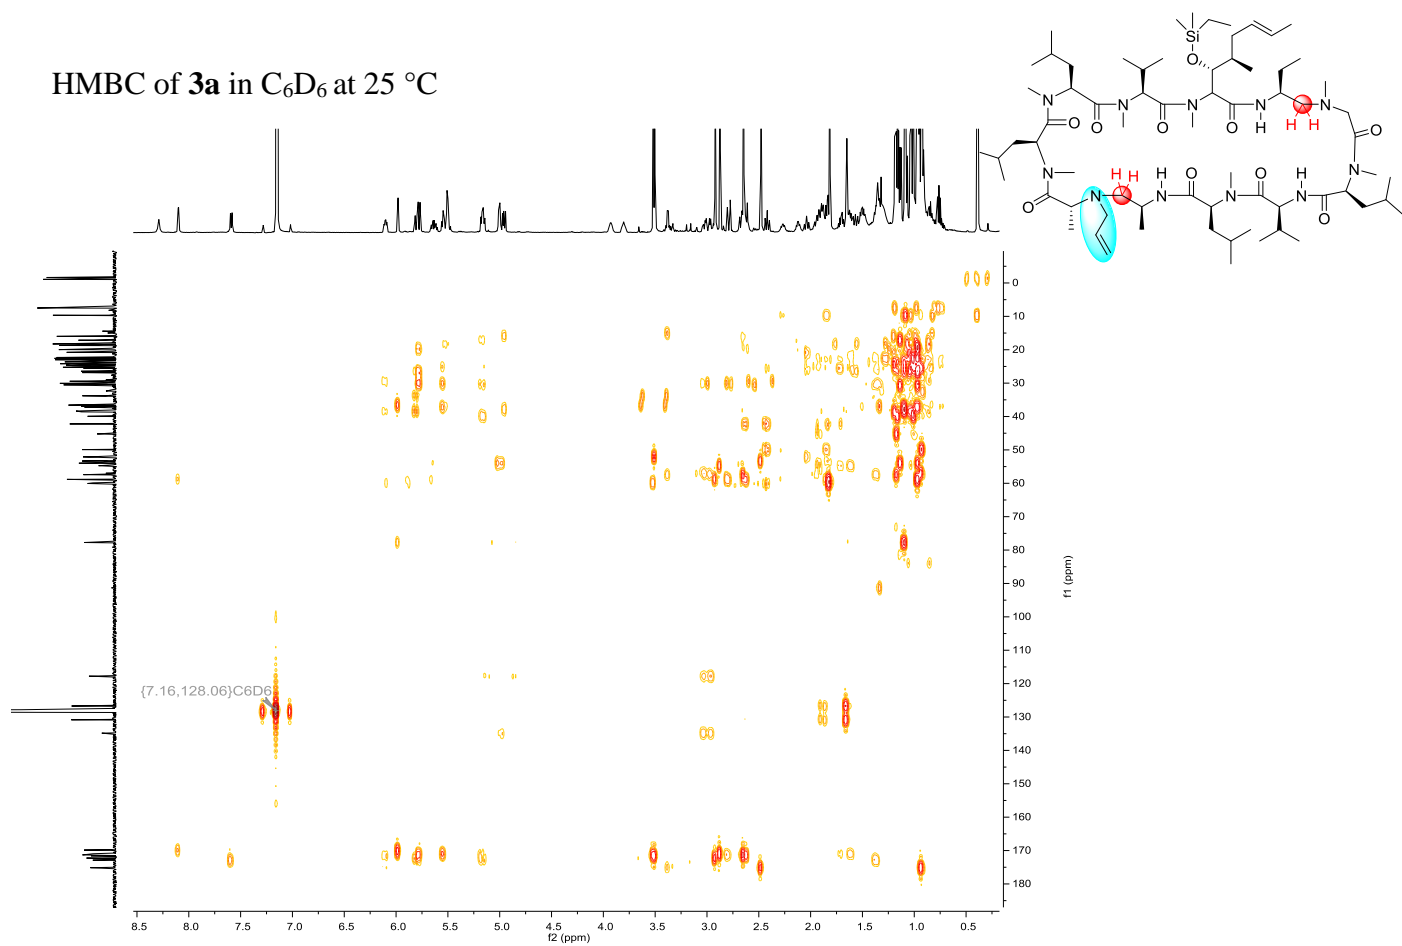

$^1\text{H}$  (600 MHz) and  $^{13}\text{C}\{\text{H}\}$  (151 MHz) NMR of **3b** in  $\text{C}_6\text{D}_6$  at 25 °C

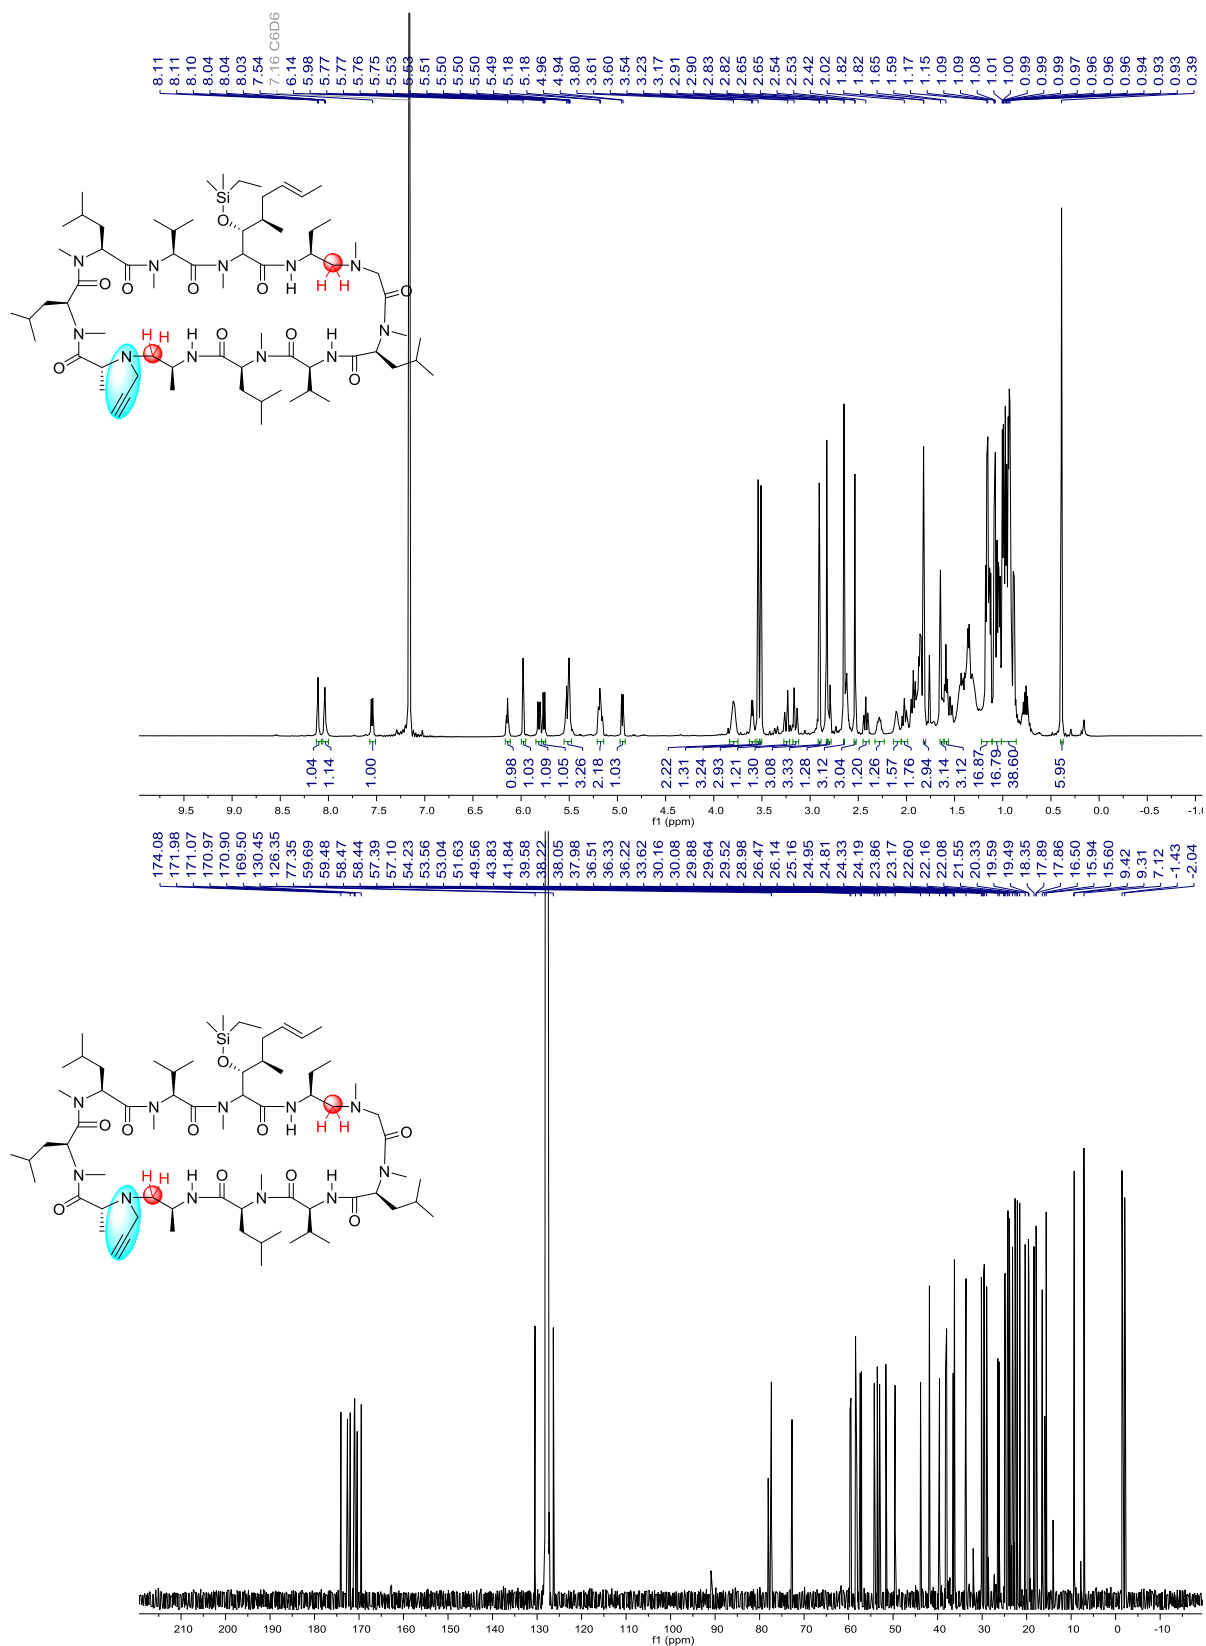

COSY and HSQC of **3b** in C<sub>6</sub>D<sub>6</sub> at 25 °C

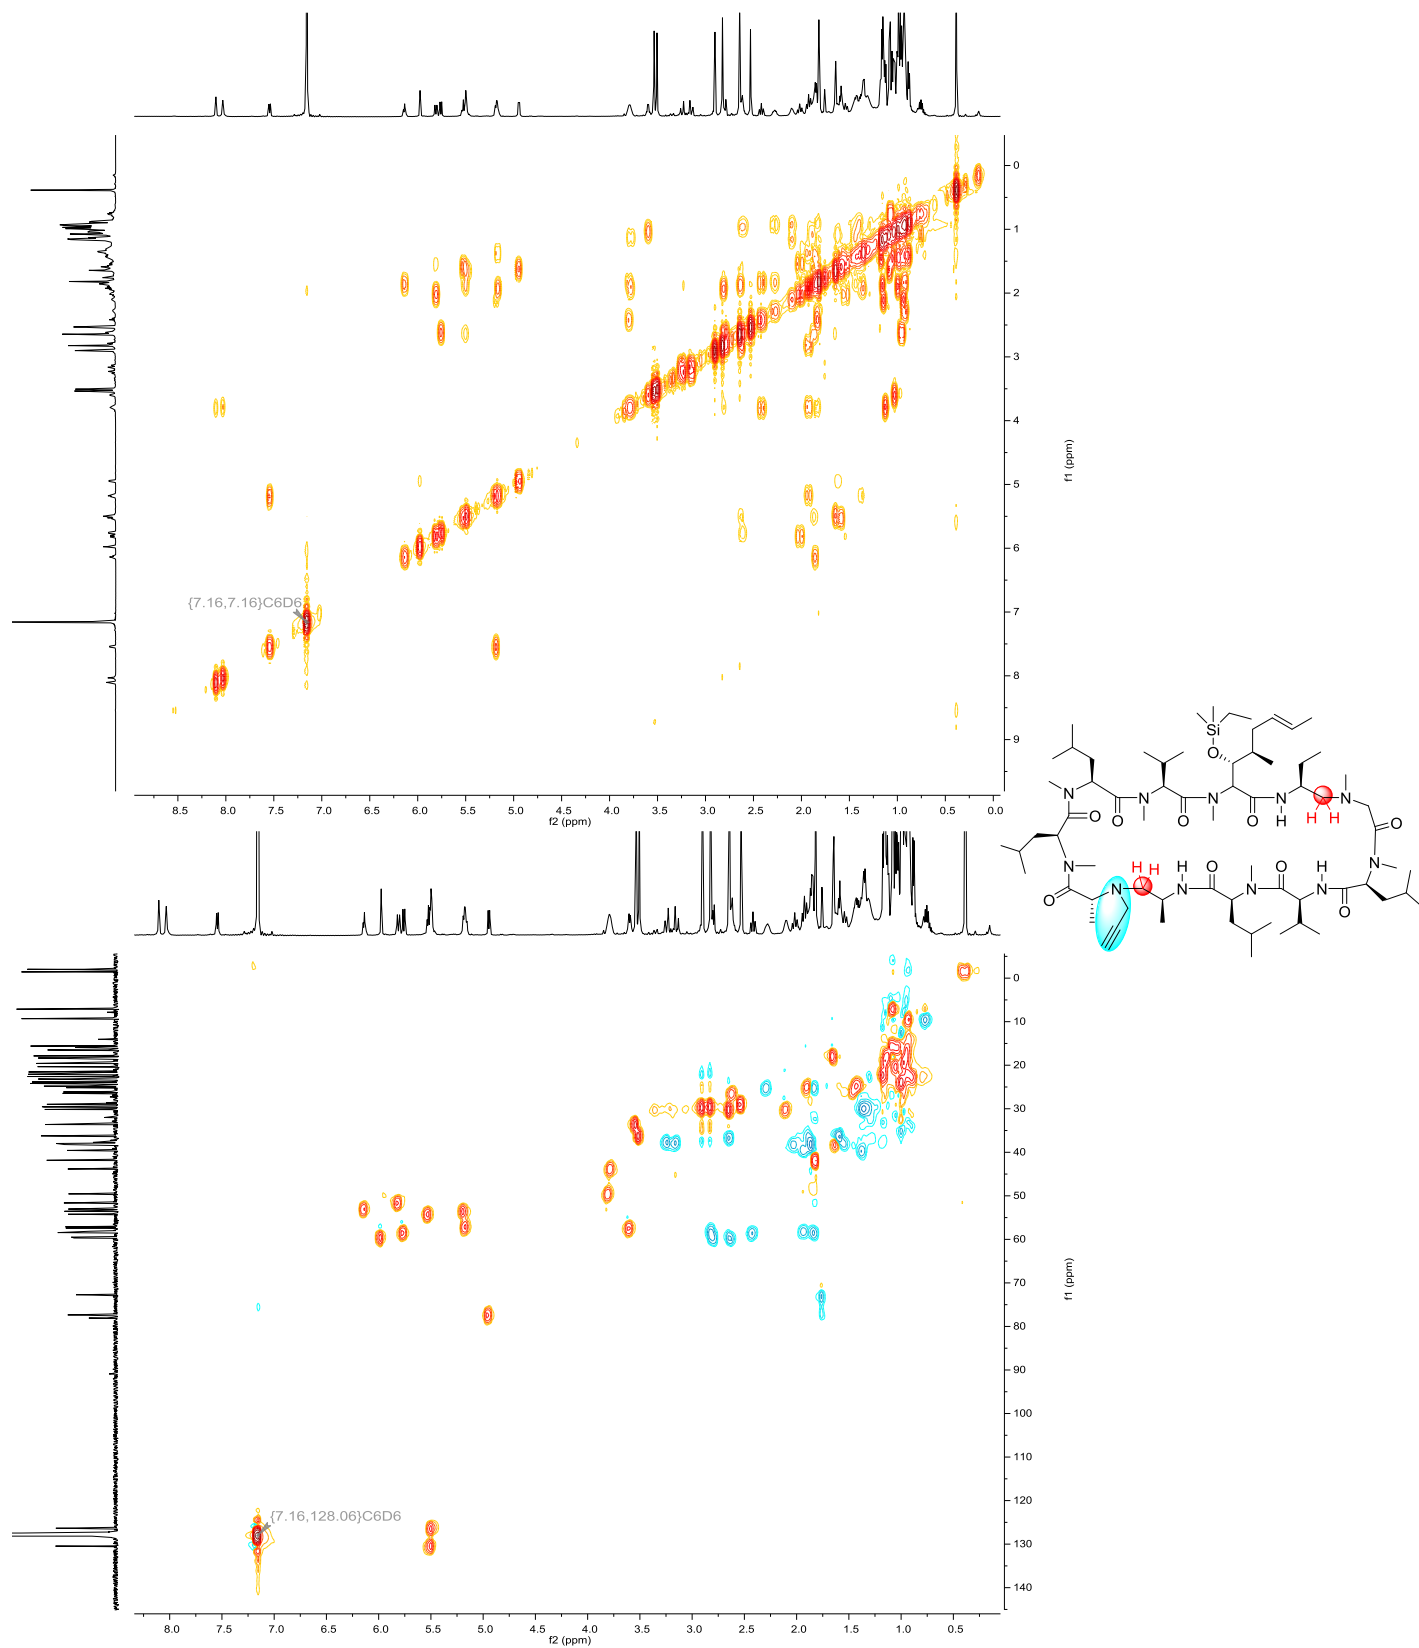

HMBC of **3b** in C<sub>6</sub>D<sub>6</sub> at 25 °C

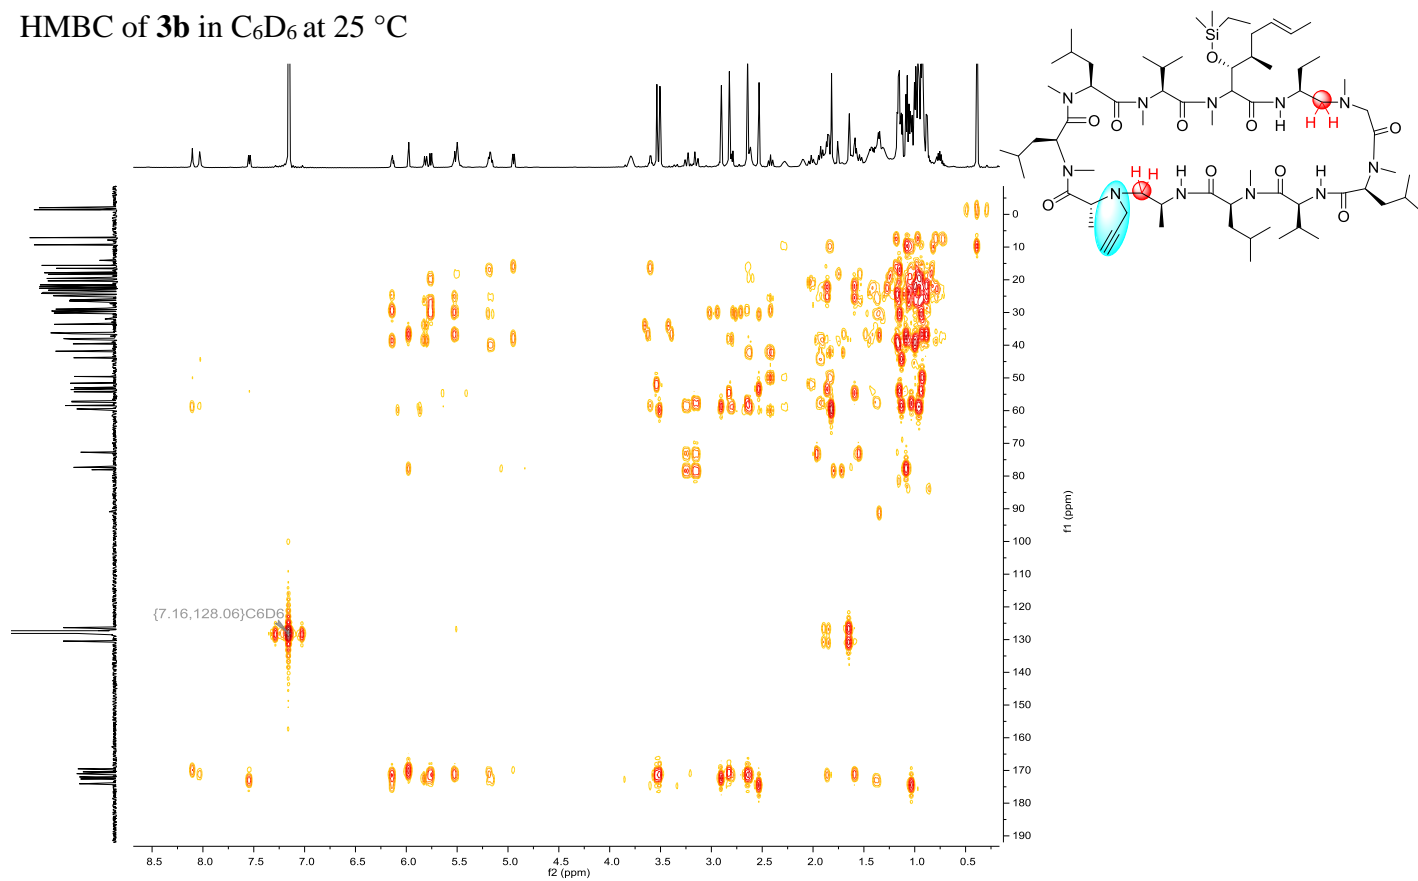

$^1\text{H}$  (600 MHz) and  $^{13}\text{C}\{\text{H}\}$  (151 MHz) NMR of **3c** in  $\text{C}_6\text{D}_6$  at 25 °C

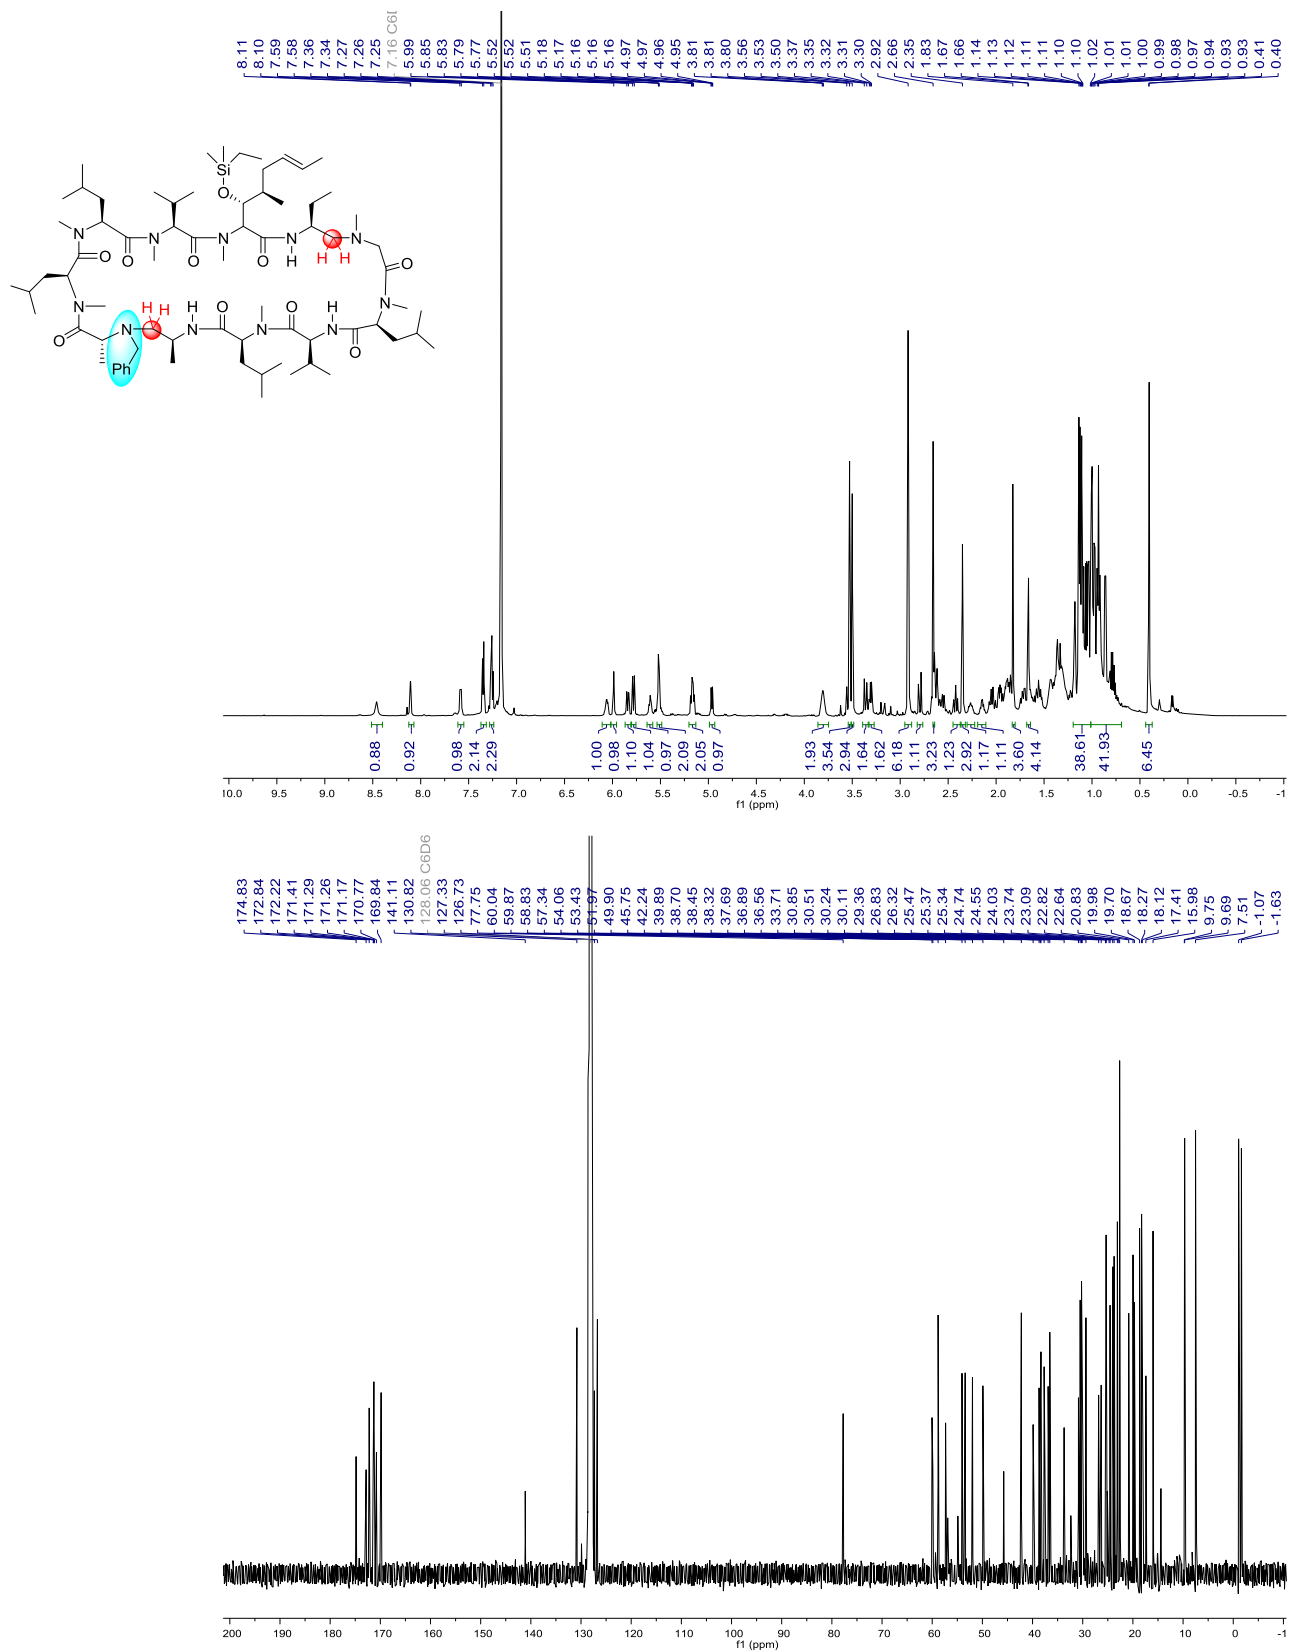

COSY and HSQC of **3c** in C<sub>6</sub>D<sub>6</sub> at 25 °C

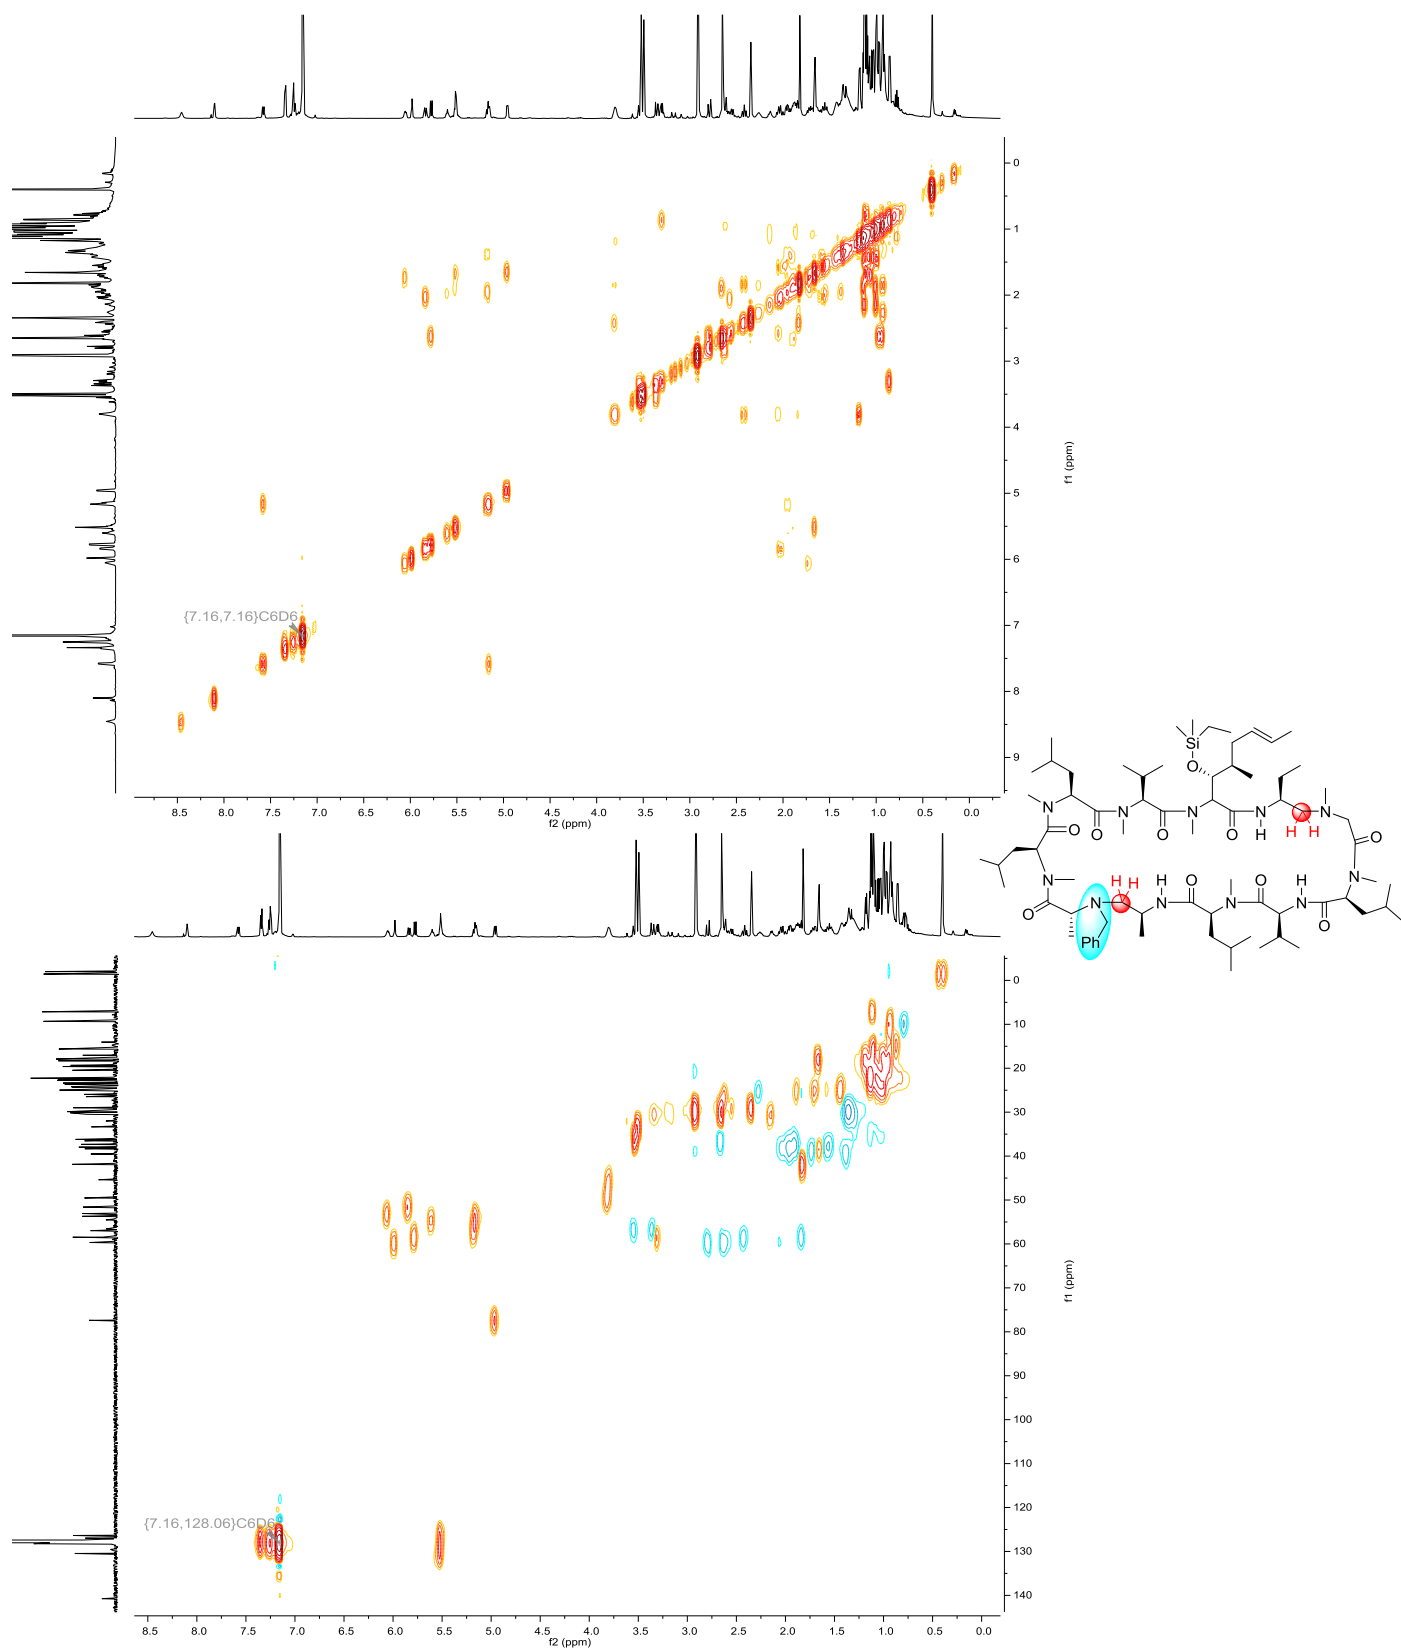



HMBC of **3c** in C<sub>6</sub>D<sub>6</sub> at 25 °C

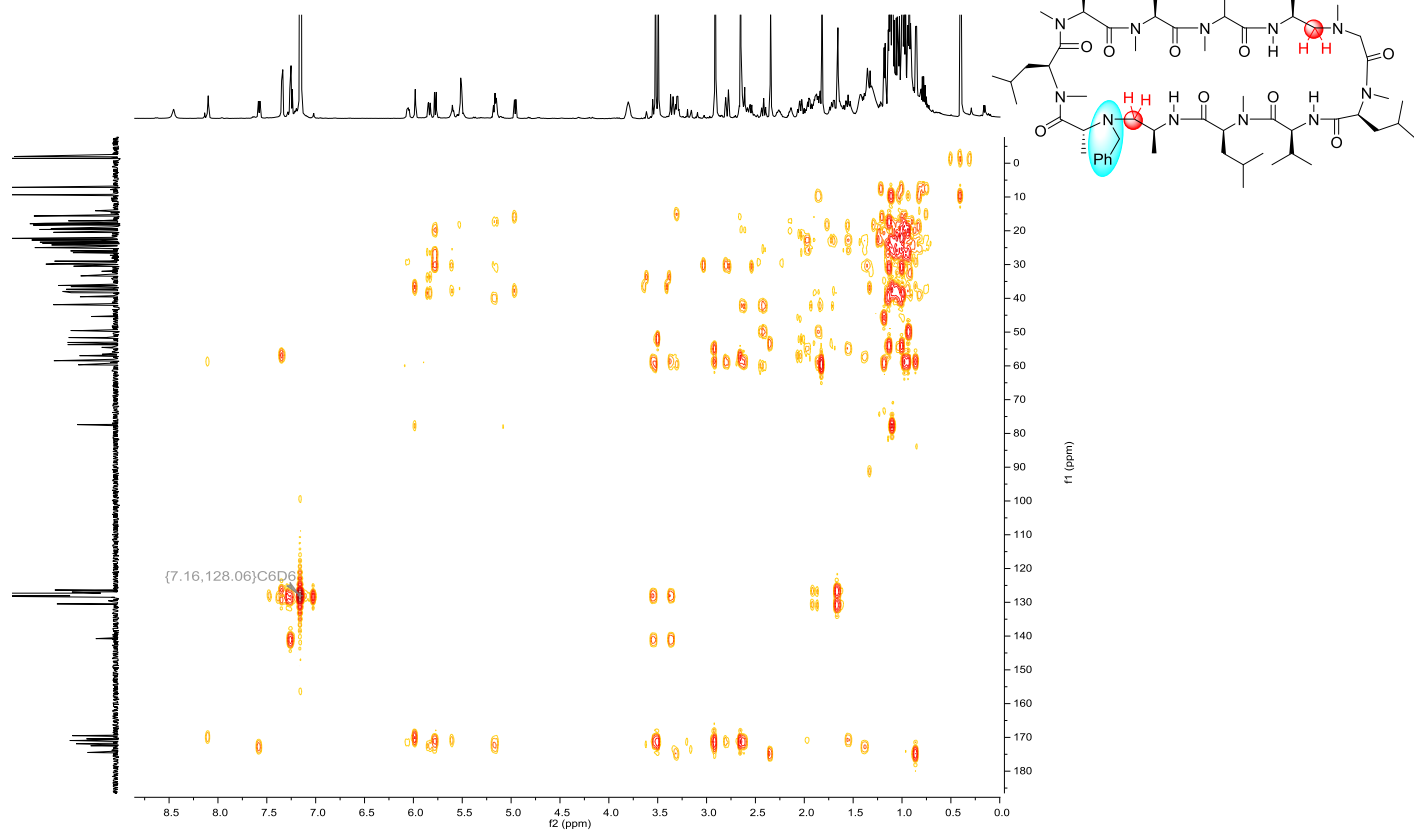

<sup>1</sup>H NMR (500 MHz) of **3d** in C<sub>6</sub>D<sub>6</sub> at 25 °C

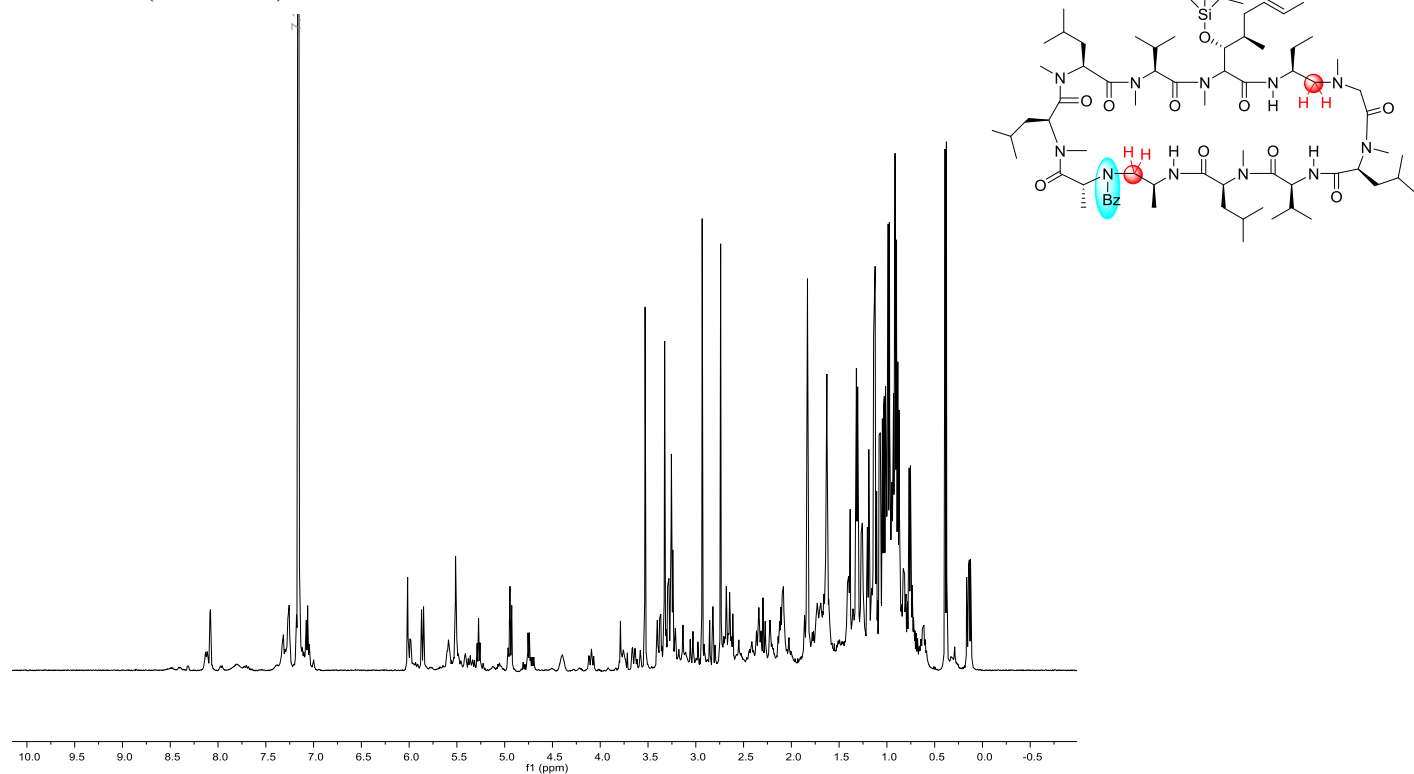

$^1\text{H}$  (600 MHz) and  $^{13}\text{C}\{^1\text{H}\}$  (151 MHz) NMR of **5** in  $\text{C}_6\text{D}_6$  at 25 °C

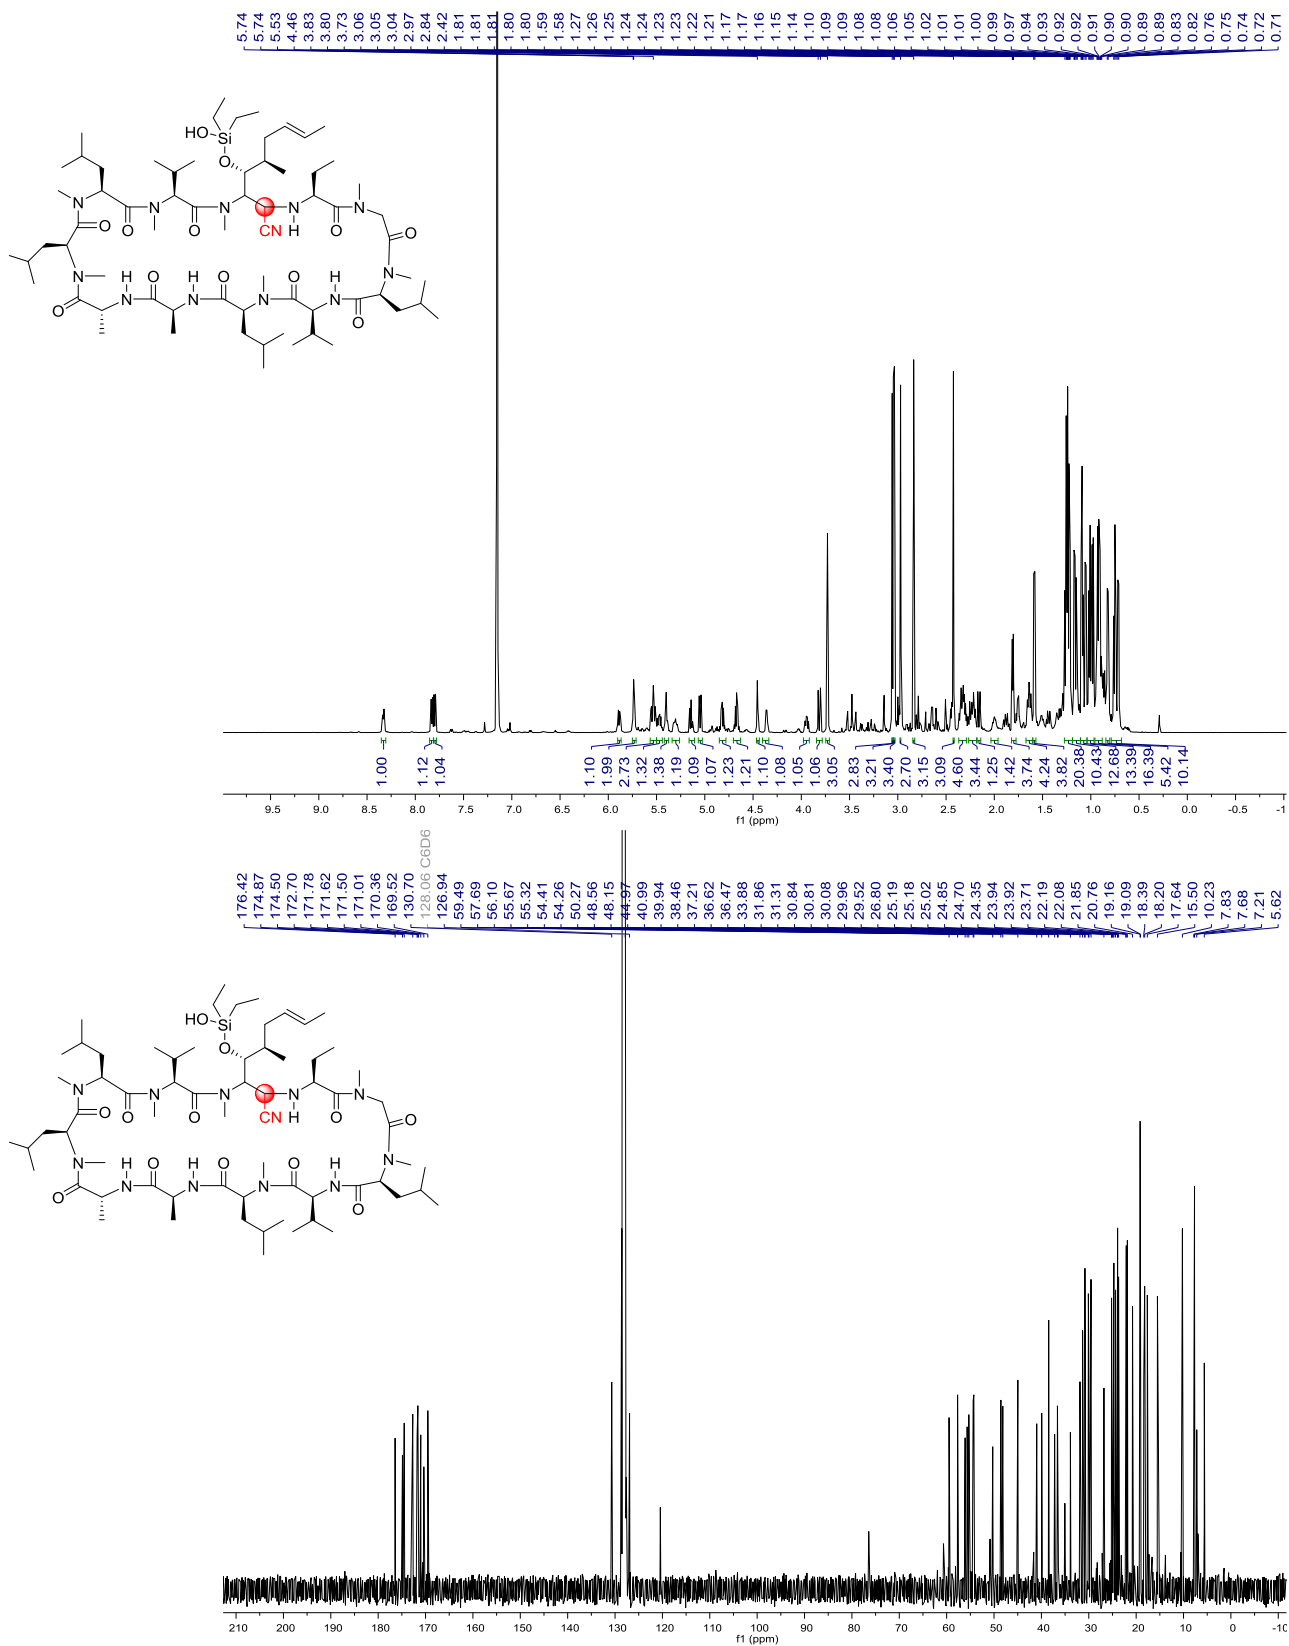

COSY and HSQC NMR of **5** in C<sub>6</sub>D<sub>6</sub> at 25 °C

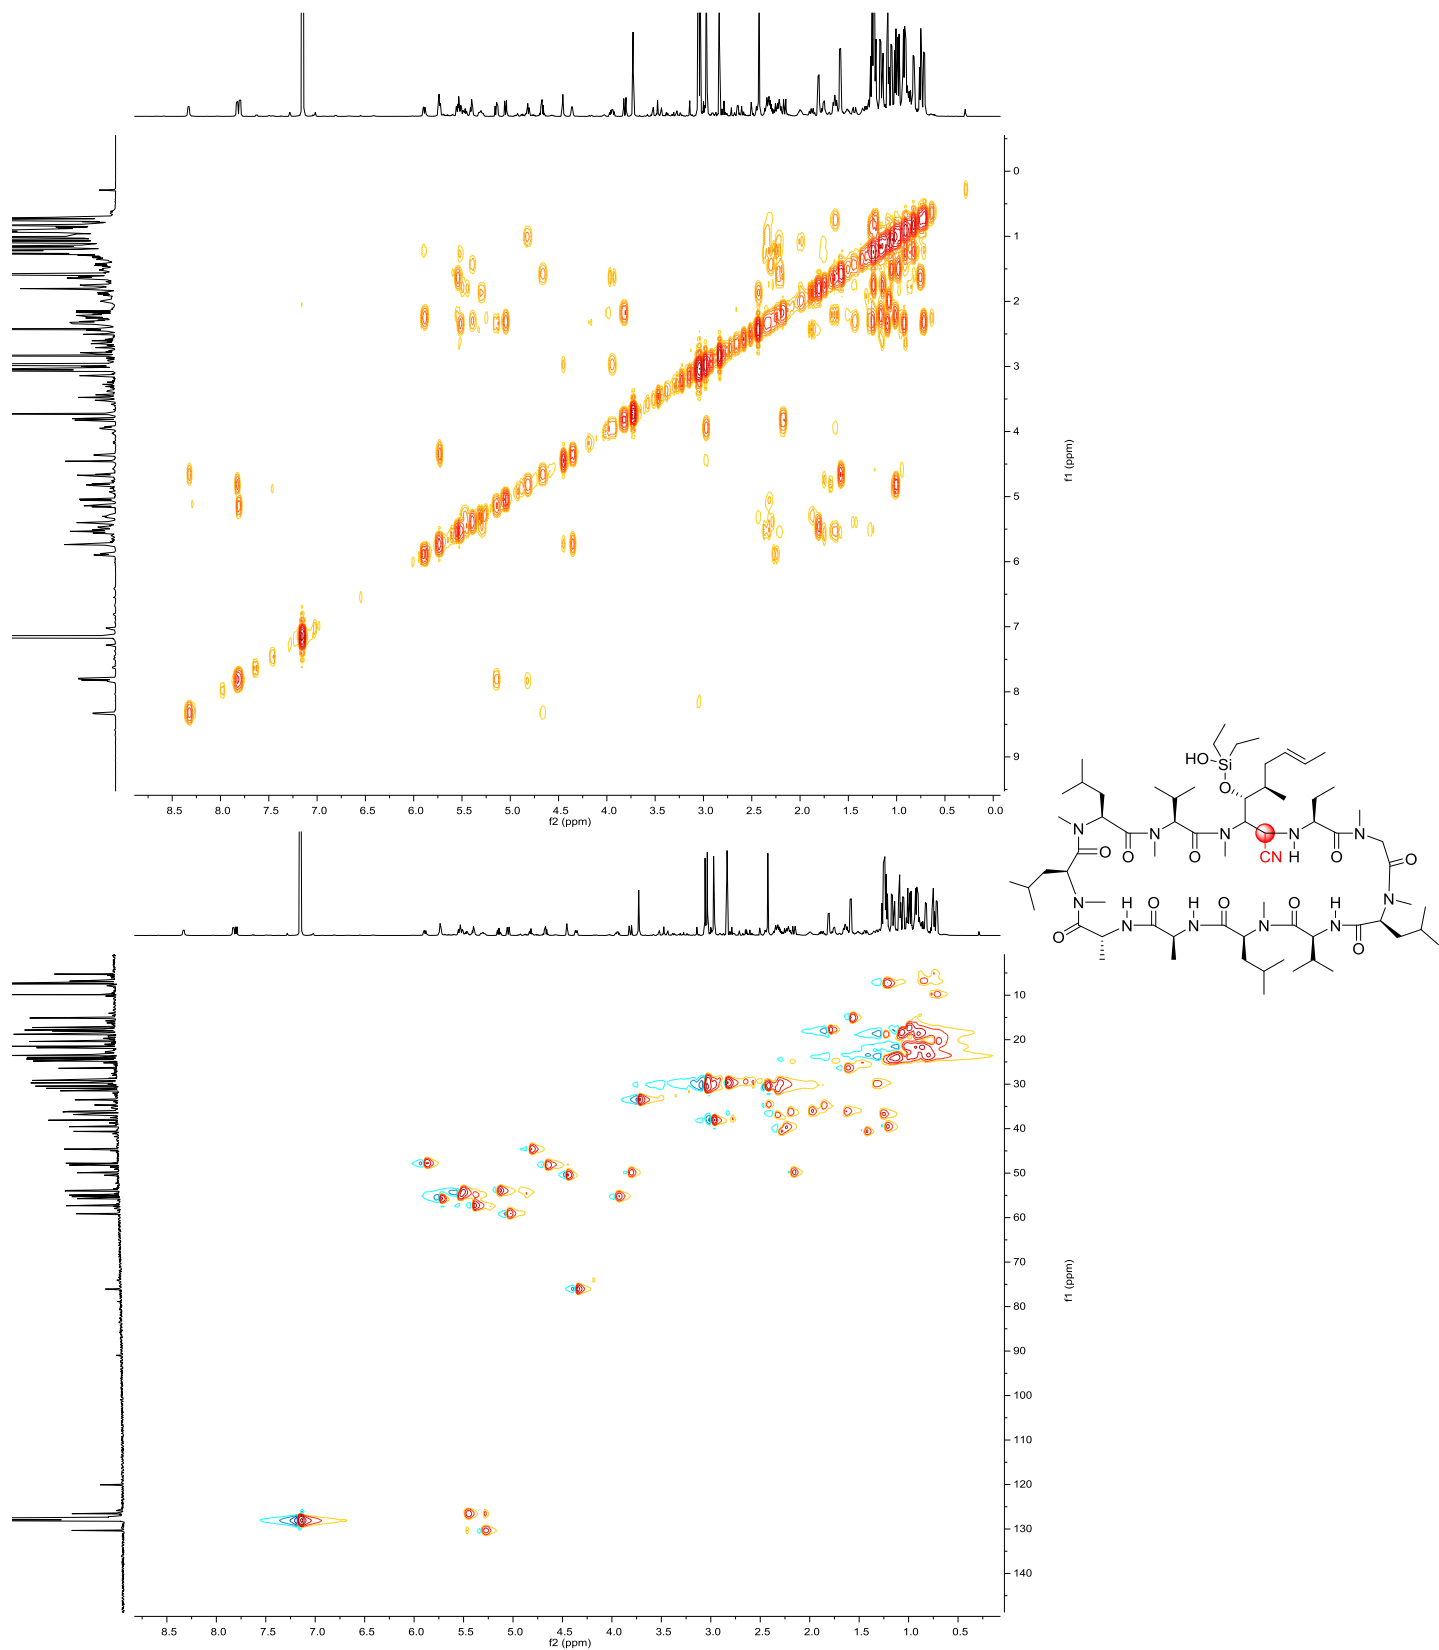



## MS<sup>2</sup> peak lists

### Observed ions for 1-OH

| m/z        | Intensity | Relative |
|------------|-----------|----------|
| 1189.87183 | 13695330  | 10.2     |
| 1188.86972 | 22706180  | 50.52    |
| 1188.86877 | 23341270  | 17.38    |
| 1171.86133 | 13183650  | 9.82     |
| 1170.85885 | 21243790  | 47.26    |
| 1170.85815 | 23225390  | 17.3     |
| 1085.76982 | 1641238.5 | 3.65     |
| 1085.76917 | 1882172.3 | 1.4      |
| 1077.7832  | 8671761   | 6.46     |
| 1076.78198 | 23319406  | 17.37    |
| 1076.78097 | 14719960  | 32.75    |
| 1075.78573 | 12745071  | 28.36    |
| 1075.78467 | 14419864  | 10.74    |
| 1062.77148 | 1700087.1 | 1.27     |
| 1061.76968 | 2843990.3 | 6.33     |
| 1061.76868 | 3243125   | 2.42     |
| 1058.77698 | 9595828   | 7.15     |
| 1057.77501 | 15910833  | 35.4     |
| 1057.77393 | 18080698  | 13.47    |
| 1043.75949 | 1810769.6 | 4.03     |
| 1043.75842 | 2188972   | 1.63     |
| 1005.74352 | 1686728.4 | 3.75     |
| 1005.74292 | 2064188.6 | 1.54     |
| 974.68268  | 1738723.9 | 1.29     |
| 973.68067  | 3106184   | 6.91     |
| 973.67987  | 3860002   | 2.87     |
| 964.69879  | 4875033   | 3.63     |
| 963.69663  | 8677061   | 19.31    |
| 963.69574  | 10762784  | 8.02     |
| 950.68359  | 2080918.1 | 1.55     |
| 949.68323  | 7680364.5 | 5.72     |
| 949.68112  | 3694479.5 | 8.22     |
| 948.68544  | 6931748   | 15.42    |
| 948.68469  | 8524024   | 6.35     |
| 934.66935  | 3134253   | 6.97     |
| 934.6684   | 3854505.8 | 2.87     |

|           |           |       |
|-----------|-----------|-------|
| 931.677   | 4956370.5 | 3.69  |
| 930.67495 | 9077565   | 20.2  |
| 930.67419 | 11965571  | 8.91  |
| 893.66217 | 3848824   | 2.87  |
| 892.65923 | 7994814   | 17.79 |
| 892.65839 | 9863546   | 7.35  |
| 863.63257 | 1666319.8 | 3.71  |
| 863.63202 | 2152206   | 1.6   |
| 853.62585 | 2442069.8 | 1.82  |
| 852.62785 | 2597481.5 | 5.78  |
| 852.62714 | 3699706.3 | 2.76  |
| 837.59894 | 2636937.8 | 1.96  |
| 836.59612 | 5156522   | 11.47 |
| 836.59558 | 7386873   | 5.5   |
| 834.61732 | 1597815.8 | 3.55  |
| 834.61694 | 2250508.5 | 1.68  |
| 822.58575 | 3864690   | 2.88  |
| 821.58545 | 6258856.5 | 13.93 |
| 821.58478 | 8615165   | 6.42  |
| 803.57481 | 2896090   | 6.44  |
| 803.57416 | 4165573   | 3.1   |
| 793.59387 | 1992960.5 | 1.48  |
| 792.59525 | 2440190.5 | 5.43  |
| 792.59485 | 3200622.3 | 2.38  |
| 774.58469 | 1955403   | 4.35  |
| 774.5838  | 2684932.5 | 2     |
| 765.55893 | 3447872.5 | 7.67  |
| 765.55853 | 4884022   | 3.64  |
| 751.55072 | 1748672.3 | 1.3   |
| 750.54955 | 3275158.8 | 7.29  |
| 750.54901 | 4824993.5 | 3.59  |
| 748.53137 | 1650908.5 | 1.23  |
| 740.53827 | 1660862   | 1.24  |
| 736.53263 | 2036913.5 | 4.53  |
| 736.5321  | 3081420.5 | 2.29  |
| 709.49649 | 1998618.1 | 4.45  |
| 709.49591 | 3310923   | 2.47  |
| 695.48871 | 1660447.6 | 1.24  |
| 694.48608 | 3828772.3 | 8.52  |
| 694.48566 | 6254752   | 4.66  |
| 681.50763 | 1646277.3 | 1.23  |
| 680.51025 | 8119519   | 6.05  |
| 680.50647 | 2892698.8 | 6.44  |

|           |           |       |           |           |       |
|-----------|-----------|-------|-----------|-----------|-------|
| 679.51137 | 11591917  | 25.79 | 440.32295 | 3305455.8 | 7.35  |
| 679.5108  | 17930716  | 13.35 | 440.32227 | 7522032   | 5.6   |
| 669.5011  | 1689872.1 | 1.26  | 439.32773 | 1998692.6 | 4.45  |
| 662.5033  | 5314113.5 | 3.96  | 439.32742 | 4577722   | 3.41  |
| 661.50041 | 12156435  | 27.05 | 435.33246 | 1727800.5 | 1.29  |
| 661.50006 | 19116668  | 14.24 | 426.31522 | 4712205.5 | 3.51  |
| 638.46155 | 4872717.5 | 3.63  | 425.34747 | 2585726   | 5.75  |
| 638.45949 | 2095752.5 | 4.66  | 425.34711 | 5851186.5 | 4.36  |
| 637.46416 | 6040486.5 | 13.44 | 425.31201 | 14200438  | 31.59 |
| 637.46387 | 9762297   | 7.27  | 425.31171 | 32652852  | 24.32 |
| 635.44818 | 1561570.9 | 1.16  | 407.33791 | 2932608.3 | 6.52  |
| 623.44871 | 3535721.5 | 7.87  | 407.33759 | 6838865.5 | 5.09  |
| 623.44824 | 6120070   | 4.56  | 399.33283 | 1656521.3 | 3.69  |
| 568.42474 | 2665172.5 | 1.98  | 399.33252 | 3819042   | 2.84  |
| 567.42247 | 6419633   | 14.28 | 398.28406 | 4839480   | 3.6   |
| 567.42175 | 12222716  | 9.1   | 397.28077 | 15852816  | 35.27 |
| 567.38639 | 1943201.6 | 4.32  | 397.28043 | 37723320  | 28.1  |
| 567.38525 | 3582971.5 | 2.67  | 394.26985 | 1687971.9 | 3.76  |
| 562.39557 | 2073255.1 | 1.54  | 394.26956 | 3976669   | 2.96  |
| 553.41211 | 4166740.8 | 3.1   | 383.26474 | 3411317.5 | 2.54  |
| 552.4115  | 8940201   | 19.89 | 381.32199 | 2097974.3 | 1.56  |
| 552.41125 | 16653552  | 12.4  | 369.2858  | 2241165.3 | 4.99  |
| 538.39602 | 1627323.6 | 3.62  | 369.28427 | 4734764.5 | 3.53  |
| 538.39569 | 3180049.8 | 2.37  | 368.29067 | 6055347.5 | 13.47 |
| 535.40387 | 1917616.9 | 1.43  | 368.29034 | 14455517  | 10.77 |
| 534.40104 | 4960781   | 11.04 | 366.27469 | 2746583   | 2.05  |
| 534.4007  | 9684131   | 7.21  | 366.23846 | 2040572.4 | 1.52  |
| 525.38324 | 3356141   | 2.5   | 357.28582 | 1610001.5 | 3.58  |
| 524.3804  | 9036276   | 20.1  | 357.28561 | 3999060.8 | 2.98  |
| 524.38    | 17684222  | 13.17 | 355.27826 | 2876584.8 | 2.14  |
| 510.36491 | 3687872.3 | 8.21  | 354.27497 | 9705597   | 21.59 |
| 510.36444 | 7644322.5 | 5.69  | 354.27469 | 24432240  | 18.2  |
| 506.36997 | 1959456.8 | 4.36  | 352.25912 | 1619992.9 | 1.21  |
| 506.36948 | 3898945.8 | 2.9   | 350.27979 | 2167155.8 | 1.61  |
| 496.38512 | 2920800.5 | 6.5   | 341.25366 | 2002068.8 | 1.49  |
| 496.38474 | 6052968.5 | 4.51  | 340.25916 | 3694905   | 2.75  |
| 496.34956 | 2684641   | 5.97  | 339.27505 | 2810791   | 2.09  |
| 496.34915 | 5701796.5 | 4.25  | 326.24372 | 3922059.5 | 8.73  |
| 481.37411 | 1775537.9 | 1.32  | 326.2435  | 10014745  | 7.46  |
| 467.3587  | 1548724.4 | 1.15  | 324.23605 | 2636737.8 | 1.96  |
| 453.34322 | 2130315   | 4.74  | 323.23284 | 8810326   | 19.6  |
| 453.3429  | 4545848.5 | 3.39  | 323.2326  | 23814576  | 17.74 |
| 450.30688 | 1849651   | 1.38  | 313.25937 | 3438031.3 | 2.56  |

|           |           |       |           |           |       |
|-----------|-----------|-------|-----------|-----------|-------|
| 312.22799 | 3006681   | 6.69  | 211.15199 | 3713153.5 | 2.77  |
| 312.22781 | 7652110.5 | 5.7   | 210.14873 | 53783880  | 40.06 |
| 308.23291 | 3115980.8 | 2.32  | 209.20116 | 3389433.3 | 2.52  |
| 299.25214 | 2228060.8 | 1.66  | 199.14403 | 25339008  | 18.87 |
| 299.24371 | 2873287.8 | 2.14  | 195.14909 | 3509189   | 2.61  |
| 298.24877 | 9379162   | 20.87 | 195.12077 | 3716517.3 | 2.77  |
| 298.24857 | 25163482  | 18.74 | 194.11749 | 57121516  | 42.54 |
| 298.21254 | 3671760   | 8.17  | 186.15999 | 25468458  | 18.97 |
| 298.21231 | 9776687   | 7.28  | 185.12839 | 1582474.8 | 1.18  |
| 297.21709 | 2750543.8 | 6.12  | 184.14371 | 1730538.9 | 1.29  |
| 297.21695 | 7147997   | 5.32  | 184.13313 | 19754144  | 14.71 |
| 287.25201 | 1609699.1 | 1.2   | 182.11748 | 5695772   | 4.24  |
| 287.24406 | 1935432.8 | 4.31  | 174.15996 | 8319207.5 | 6.2   |
| 287.2438  | 5034137.5 | 3.75  | 171.14899 | 8375172.5 | 6.24  |
| 286.24877 | 8398680   | 18.69 | 169.10503 | 4248700.5 | 3.16  |
| 286.24863 | 22105368  | 16.46 | 168.1492  | 2883788.8 | 2.15  |
| 281.24142 | 2385964.5 | 1.78  | 168.10173 | 81324712  | 60.57 |
| 280.23831 | 8692181   | 19.34 | 167.12579 | 2127492.8 | 1.58  |
| 280.23807 | 23272260  | 17.33 | 166.12254 | 37599856  | 28    |
| 270.21719 | 3282060   | 2.44  | 157.10503 | 2503075.3 | 1.86  |
| 270.18113 | 5441283.5 | 12.11 | 156.14917 | 5827506   | 4.34  |
| 270.18103 | 14851423  | 11.06 | 156.13812 | 18190694  | 13.55 |
| 269.24133 | 3084332.8 | 2.3   | 156.10184 | 55448296  | 41.3  |
| 269.18591 | 5384679.5 | 11.98 | 155.11772 | 2697389.8 | 2.01  |
| 269.1857  | 15147603  | 11.28 | 143.11768 | 6493618   | 4.84  |
| 268.23827 | 12406901  | 27.6  | 143.08942 | 3288592   | 2.45  |
| 268.2381  | 35180232  | 26.2  | 142.08609 | 78846176  | 58.72 |
| 255.20668 | 5414767.5 | 12.05 | 141.10204 | 4124918.8 | 3.07  |
| 255.20647 | 15755250  | 11.73 | 140.14317 | 1634775.5 | 1.22  |
| 253.19077 | 2299667   | 1.71  | 138.12758 | 4991110   | 3.72  |
| 252.20683 | 2642153.5 | 1.97  | 136.11192 | 1587813.6 | 1.18  |
| 250.22777 | 1896932.1 | 4.22  | 128.10696 | 17705752  | 13.19 |
| 250.22758 | 5428987.5 | 4.04  | 126.05491 | 6820436.5 | 5.08  |
| 241.19103 | 4157959.5 | 9.25  | 125.09598 | 2076448.5 | 1.55  |
| 241.19086 | 11825330  | 8.81  | 114.09148 | 32932776  | 24.53 |
| 239.17514 | 2995315.3 | 2.23  | 113.10747 | 4666722.5 | 3.48  |
| 237.19595 | 14246427  | 10.61 | 107.08561 | 1597010.8 | 1.19  |
| 227.17517 | 7428008.5 | 5.53  | 100.11236 | 29952714  | 22.31 |
| 225.16756 | 10637802  | 7.92  | 100.0396  | 16069140  | 11.97 |
| 224.16426 | 134266848 | 100   |           |           |       |
| 213.13113 | 4903086.5 | 3.65  |           |           |       |
| 213.12325 | 6492317   | 4.84  |           |           |       |
| 212.12793 | 76550632  | 57.01 |           |           |       |

**Observed ions for 3d**

| <b>m/z</b> | <b>Intensity</b> | <b>Relative</b> |
|------------|------------------|-----------------|
| 1278.92199 | 36042376         | 14.01           |
| 1260.91095 | 26170330         | 10.17           |
| 1232.91584 | 2173574.5        | 0.85            |
| 1175.82175 | 1549508.9        | 0.6             |
| 1166.83261 | 14144423         | 5.5             |
| 1165.83714 | 16962372         | 6.59            |
| 1156.88473 | 4501804          | 1.75            |
| 1151.82201 | 4784671.5        | 1.86            |
| 1147.82661 | 11280128         | 4.39            |
| 1133.81122 | 2036090.1        | 0.79            |
| 1128.88944 | 1313084.8        | 0.51            |
| 1095.7952  | 1892703.9        | 0.74            |
| 1063.73234 | 3496134          | 1.36            |
| 1053.7482  | 6435564.5        | 2.5             |
| 1046.7997  | 1769398.5        | 0.69            |
| 1044.79537 | 2204449.3        | 0.86            |
| 1039.73255 | 3170827          | 1.23            |
| 1038.73696 | 19921036         | 7.74            |
| 1028.78898 | 1599682.4        | 0.62            |
| 1024.7215  | 7024794          | 2.73            |
| 1020.72653 | 8706051          | 3.38            |
| 1006.71061 | 2917682.5        | 1.13            |
| 982.71046  | 11516644         | 4.48            |
| 942.67897  | 5129964          | 1.99            |
| 936.63192  | 2017359.1        | 0.78            |
| 926.64764  | 9318923          | 3.62            |
| 919.69913  | 2401769.8        | 0.93            |
| 912.63177  | 3843225.3        | 1.49            |
| 911.63662  | 33018848         | 12.84           |
| 901.68853  | 1524128.9        | 0.59            |
| 893.6259   | 39699168         | 15.43           |
| 883.64141  | 16494973         | 6.41            |
| 867.64644  | 1359099.3        | 0.53            |
| 865.63086  | 9780654          | 3.8             |
| 857.62555  | 3607781.8        | 1.4             |
| 855.6099   | 9143639          | 3.55            |

|           |           |       |
|-----------|-----------|-------|
| 849.65684 | 1534627.6 | 0.6   |
| 840.59902 | 1568167.5 | 0.61  |
| 838.58331 | 1495974.5 | 0.58  |
| 827.61475 | 1474755   | 0.57  |
| 826.58311 | 2375614.3 | 0.92  |
| 807.60986 | 1477502.8 | 0.57  |
| 799.54709 | 16921142  | 6.58  |
| 792.59882 | 11436330  | 4.45  |
| 789.59929 | 2021956.5 | 0.79  |
| 784.57208 | 2034838.1 | 0.79  |
| 784.53646 | 2628321.8 | 1.02  |
| 781.53757 | 1407484.3 | 0.55  |
| 774.58833 | 9815040   | 3.82  |
| 771.55207 | 5898258.5 | 2.29  |
| 770.55692 | 1372590.1 | 0.53  |
| 765.53003 | 1360210.4 | 0.53  |
| 761.60432 | 2307096.8 | 0.9   |
| 759.55224 | 2554424.5 | 0.99  |
| 756.5413  | 1863858.6 | 0.72  |
| 744.5412  | 1567640.3 | 0.61  |
| 736.57254 | 13762228  | 5.35  |
| 728.50991 | 8410490   | 3.27  |
| 727.51458 | 11363994  | 4.42  |
| 718.5619  | 4959782.5 | 1.93  |
| 713.4989  | 2892849.5 | 1.12  |
| 710.49913 | 3554552.5 | 1.38  |
| 709.50383 | 1969636.1 | 0.77  |
| 700.51478 | 4364468.5 | 1.7   |
| 694.52538 | 2049719.5 | 0.8   |
| 693.5301  | 2846846.3 | 1.11  |
| 689.49878 | 2204502.8 | 0.86  |
| 680.50965 | 9352445   | 3.64  |
| 679.51438 | 65363940  | 25.41 |
| 677.51027 | 3208250.8 | 1.25  |
| 674.49908 | 1373167.4 | 0.53  |
| 665.53502 | 3624719.5 | 1.41  |
| 665.49881 | 2375871   | 0.92  |
| 661.50371 | 54302328  | 21.11 |
| 657.47233 | 2589120.8 | 1.01  |
| 657.43619 | 4126350.8 | 1.6   |
| 651.51946 | 3002262.8 | 1.17  |
| 643.45665 | 1580716.1 | 0.61  |
| 639.42536 | 4584070   | 1.78  |



|           |           |       |           |           |       |
|-----------|-----------|-------|-----------|-----------|-------|
| 635.52433 | 1621995.5 | 0.63  | 487.32987 | 24673034  | 9.59  |
| 633.50878 | 2548038.3 | 0.99  | 482.37211 | 3522737.8 | 1.37  |
| 629.44101 | 5106268.5 | 1.99  | 481.37693 | 3191988.5 | 1.24  |
| 624.48314 | 5099516   | 1.98  | 479.36117 | 3439143.8 | 1.34  |
| 623.48793 | 3115839.3 | 1.21  | 478.37718 | 1796834.8 | 0.7   |
| 620.4769  | 2140657.8 | 0.83  | 473.31423 | 4969465.5 | 1.93  |
| 615.46162 | 1308885   | 0.51  | 471.2986  | 2726764.3 | 1.06  |
| 614.43002 | 14319477  | 5.57  | 468.39282 | 2533615.8 | 0.99  |
| 606.47247 | 3441845.5 | 1.34  | 467.36124 | 3351813.5 | 1.3   |
| 600.41432 | 12329323  | 4.79  | 464.36157 | 1822601.1 | 0.71  |
| 598.39858 | 1778101   | 0.69  | 459.29841 | 13156615  | 5.11  |
| 594.4612  | 1494630.6 | 0.58  | 453.34541 | 7931707   | 3.08  |
| 586.39867 | 8934034   | 3.47  | 451.32983 | 1315722.9 | 0.51  |
| 582.40371 | 3060132.3 | 1.19  | 450.30926 | 4250317   | 1.65  |
| 579.46153 | 1713507.4 | 0.67  | 440.32495 | 14882123  | 5.79  |
| 568.38795 | 1851132   | 0.72  | 439.32969 | 17302032  | 6.73  |
| 567.42504 | 29336054  | 11.41 | 435.33473 | 4189545   | 1.63  |
| 566.42983 | 4647957   | 1.81  | 430.27181 | 1383237.8 | 0.54  |
| 562.39855 | 3791029.8 | 1.47  | 426.34559 | 2336473.8 | 0.91  |
| 558.40355 | 1339721.5 | 0.52  | 425.35021 | 55531148  | 21.59 |
| 558.36722 | 1351806.5 | 0.53  | 425.31397 | 58224312  | 22.64 |
| 553.44588 | 4347834.5 | 1.69  | 424.31866 | 3359813   | 1.31  |
| 553.40955 | 2243898.8 | 0.87  | 421.319   | 2980815   | 1.16  |
| 552.44999 | 2235011   | 0.87  | 420.32373 | 1433114.4 | 0.56  |
| 552.41415 | 36107528  | 14.04 | 412.32987 | 1684423.1 | 0.65  |
| 549.40339 | 2575747.3 | 1     | 411.33466 | 7694958   | 2.99  |
| 548.41929 | 1413981.9 | 0.55  | 407.33968 | 21834822  | 8.49  |
| 538.43487 | 16656781  | 6.48  | 406.30809 | 4643661.5 | 1.81  |
| 538.3986  | 3320382   | 1.29  | 399.33459 | 4638689   | 1.8   |
| 535.39883 | 3662182   | 1.42  | 398.24544 | 2171883.8 | 0.84  |
| 534.40363 | 16791110  | 6.53  | 394.27167 | 9504305   | 3.7   |
| 533.40835 | 18393080  | 7.15  | 393.32399 | 1530357.4 | 0.59  |
| 525.34585 | 1561441.6 | 0.61  | 392.29231 | 2196639   | 0.85  |
| 524.41927 | 2938699.8 | 1.14  | 391.27193 | 1427232   | 0.55  |
| 524.38287 | 2039247.9 | 0.79  | 382.30797 | 4692308   | 1.82  |
| 520.42435 | 2164860.3 | 0.84  | 381.32392 | 2354187   | 0.92  |
| 519.39268 | 2379841.3 | 0.93  | 380.29231 | 1932807.4 | 0.75  |
| 514.39853 | 1903519.4 | 0.74  | 379.27186 | 2557538.8 | 0.99  |
| 506.37234 | 10814657  | 4.2   | 369.28754 | 9271605   | 3.6   |
| 497.37182 | 2411458.3 | 0.94  | 368.29229 | 56892088  | 22.12 |
| 496.38784 | 18935338  | 7.36  | 366.27663 | 4961194   | 1.93  |
| 495.39248 | 2871748.5 | 1.12  | 360.2296  | 41999840  | 16.33 |
| 488.31393 | 2003878.8 | 0.78  | 357.28743 | 9774528   | 3.8   |

|           |           |       |           |           |       |
|-----------|-----------|-------|-----------|-----------|-------|
| 354.2765  | 53199936  | 20.68 | 239.17651 | 9415311   | 3.66  |
| 352.26087 | 3111638.3 | 1.21  | 237.19725 | 13776984  | 5.36  |
| 350.28159 | 2363139.3 | 0.92  | 237.1609  | 1351855.3 | 0.53  |
| 346.2139  | 1836554.3 | 0.71  | 234.11357 | 3390369.8 | 1.32  |
| 342.219   | 1481834.1 | 0.58  | 233.12955 | 257217648 | 100   |
| 341.2925  | 1421190.6 | 0.55  | 232.13436 | 10868739  | 4.23  |
| 341.25612 | 3461918.8 | 1.35  | 230.22382 | 2268999.8 | 0.88  |
| 340.26091 | 3596330.8 | 1.4   | 228.20814 | 1323252   | 0.51  |
| 339.27691 | 5157122.5 | 2     | 227.1765  | 17744724  | 6.9   |
| 332.23457 | 8337806   | 3.24  | 227.1401  | 1387034.6 | 0.54  |
| 326.24513 | 26993092  | 10.49 | 225.19719 | 1846918.1 | 0.72  |
| 325.21356 | 1585657.9 | 0.62  | 224.1656  | 108055808 | 42.01 |
| 323.23429 | 49910900  | 19.4  | 214.15605 | 4292270.5 | 1.67  |
| 314.1876  | 1557202.9 | 0.61  | 213.16077 | 1974869.3 | 0.77  |
| 313.26105 | 8307657   | 3.23  | 213.12441 | 24741676  | 9.62  |
| 312.22944 | 14091608  | 5.48  | 212.12916 | 67364336  | 26.19 |
| 308.23457 | 8252762   | 3.21  | 211.18154 | 1351807.9 | 0.53  |
| 307.20294 | 6734531   | 2.62  | 210.14991 | 61123912  | 23.76 |
| 306.21893 | 3237233.5 | 1.26  | 209.20229 | 2776956   | 1.08  |
| 303.17161 | 1799520.3 | 0.7   | 205.13459 | 4268897.5 | 1.66  |
| 301.2611  | 1905022.1 | 0.74  | 204.13934 | 3350208.5 | 1.3   |
| 299.24543 | 2531666.3 | 0.98  | 199.1815  | 2704218.3 | 1.05  |
| 298.25021 | 35150556  | 13.67 | 199.14512 | 17004688  | 6.61  |
| 298.21385 | 10456267  | 4.07  | 195.1502  | 3232632.3 | 1.26  |
| 297.21861 | 9449814   | 3.67  | 194.11858 | 46971668  | 18.26 |
| 293.22356 | 4313496.5 | 1.68  | 186.16104 | 26426420  | 10.27 |
| 287.2454  | 3080058.8 | 1.2   | 185.1658  | 6214432.5 | 2.42  |
| 286.25013 | 26306776  | 10.23 | 185.12939 | 1445667   | 0.56  |
| 283.20285 | 4496704.5 | 1.75  | 184.14537 | 1606767.8 | 0.62  |
| 280.23962 | 29240616  | 11.37 | 184.13416 | 17283358  | 6.72  |
| 280.20325 | 2306638.5 | 0.9   | 182.11854 | 60560112  | 23.54 |
| 279.208   | 1345934.1 | 0.52  | 174.16099 | 8776369   | 3.41  |
| 270.2188  | 6373204   | 2.48  | 171.15001 | 9088278   | 3.53  |
| 269.18715 | 91232896  | 35.47 | 168.17547 | 3262220   | 1.27  |
| 268.23954 | 38233076  | 14.86 | 168.15032 | 3035683.8 | 1.18  |
| 255.20785 | 20319702  | 7.9   | 168.10277 | 80679944  | 31.37 |
| 253.1922  | 3770298.8 | 1.47  | 166.12351 | 34106360  | 13.26 |
| 252.20819 | 4749032.5 | 1.85  | 162.09211 | 2320499.3 | 0.9   |
| 250.22892 | 4473590.5 | 1.74  | 157.1707  | 6908930   | 2.69  |
| 245.19836 | 2922027.3 | 1.14  | 156.15027 | 6596958.5 | 2.56  |
| 242.22381 | 3686906   | 1.43  | 156.13906 | 15622533  | 6.07  |
| 241.19217 | 20708710  | 8.05  | 156.10272 | 122613400 | 47.67 |
| 239.21289 | 1728971.4 | 0.67  | 155.11859 | 3793366.8 | 1.47  |

154.08695 1982302.6 0.77
